# Supplementary material for: Life and death in the Chicxulub impact crater: a record of the Paleocene–Eocene Thermal Maximum
Source: Copernicus journal article supplement (doi:10.5194/cp-16-1889-2020), 2020-10-19
Supplement: Supplementary file 1 [file cp-16-1889-2020-supplement.zip]

Archive with 3 entries (3 files):
- Smith et al. 2020. Supplementary methods 0713.docx
- cp-16-1889-2020-supplement-title-page.pdf
- Smith et al. 2020. Supplementary data 0720.xlsx
