# Supplementary material for: Life and death in the Chicxulub impact crater: a record of the Paleocene–Eocene Thermal Maximum
Source: Copernicus journal article supplement (doi:10.5194/cp-16-1889-2020), 2020-10-19
Supplement: Supplementary file 1 [file cp-16-1889-2020-supplement.zip › cp-16-1889-2020-supplement-title-page.pdf]

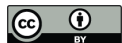

## *Supplement of*

# **Life and death in the Chicxulub impact crater: a record of the Paleocene–Eocene Thermal Maximum**

**Vann Smith et al.**

*Correspondence to:* Vann Smith ([vannpaleo@gmail.com](mailto:vannpaleo@gmail.com))

- [cp-16-1889-2020-supplement-title-page.pdf](#)
- Smith et al. 2020. Supplementary data 0720.xlsx
- Smith et al. 2020. Supplementary methods 0713.docx

The copyright of individual parts of the supplement might differ from the CC BY 4.0 License.
