# Supplementary material for: Life and death in the Chicxulub impact crater: a record of the Paleocene–Eocene Thermal Maximum
Source: Copernicus journal article supplement (doi:10.5194/cp-16-1889-2020), 2020-10-19
Supplement: Supplementary file 1 [file Smith et al. 2020. Supplementary data 0720.xlsx]

## Sheet: CN Isotopes and TOC
Core	Sample interval (cm)	Sample depth (mbsf)	Sample weight (mg.)	N Signal (V)	C Signal (V)	Conc. N (%)	Conc. C (%)	δ15N At-air (‰)	δ13C VPDB (‰)	TOC/TN		Wt. Tube	Wt. Tube + Sample	Wt. Tube + acidified sample	Wt. Sample	Wt. Insoluble	Wt. soluble	Wt% CO3	Wt% Insoluble	TOC
36R-1	11.5-13.5	604.165	41.717	0.128	1.037	0.0172344	0.15657	0.304	-26.235	1.39563		14.2351	14.9238	14.3409	0.6887	0.1058	0.5829	84.6377	15.3623	0.0240527
36R-2	65.5-67.5	605.695	46.489	0.123	1.242	0.0148612	0.168273	-0.293	-26.356	1.36278		14.3345	15.3922	14.4618	1.0577	0.1273	0.9304	87.9645	12.0355	0.0202526
37R-1	0.0-0.5	607.023	25.541	0.766	3.275	0.0587657	0.653938	0.94	-27.46	1.82381		6.724	7.145	6.793	0.421	0.069	0.352	83.6105	16.3895	0.107177
37R-1	0.5-1.0	607.028	25.36	0.963	4.651	0.0744063	0.935319	1.04	-27.43	1.94861		6.861	7.19	6.912	0.329	0.051	0.278	84.4985	15.5015	0.144989
37R-1	1.0-1.5	607.033	27.105	0.796	3.887	0.0575435	0.731355	0.92	-27.49	2.16504		6.792	7.109	6.846	0.317	0.054	0.263	82.9653	17.0347	0.124584
37R-1	1.5-2.0	607.038	28.328	0.97	5.745	0.0670948	1.03428	-0.07	-27.97	2.61507		6.795	7.131	6.852	0.336	0.057	0.279	83.0357	16.9643	0.175458
37R-1	2.0-2.5	607.043	31.416	1.113	5.158	0.0694188	0.837324	0.07	-27.86	2.78983		6.816	7.257	6.918	0.441	0.102	0.339	76.8707	23.1293	0.193667
37R-1	2.5-3.0	607.048	31.147	1.218	6.176	0.0766239	1.01124	-0.73	-28.17	3.58177		6.853	7.332	6.983	0.479	0.13	0.349	72.8601	27.1399	0.274449
37R-1	3.0-3.5	607.053	34.459	1.261	6.335	0.0717043	0.937577	-0.93	-28.06	3.86199		9.479	9.953	9.619	0.474	0.14	0.334	70.4641	29.5359	0.276921
37R-1	3.5-4.0	607.058	30.17	1.17	6.32	0.0759877	1.06833	-0.87	-27.97	4.69904		9.385	9.756	9.509	0.371	0.124	0.247	66.5768	33.4232	0.357069
37R-1	4.0-4.5	607.062	33.467	1.884	10.455	0.110305	1.5932	-1.5	-28.67	6.00298		9.461	9.858	9.626	0.397	0.165	0.232	58.4383	41.5617	0.662161
37R-1	4.5-5.0	607.067	9.732	1.286	9.175	0.267872	4.36849	-0.3	-29.69	6.99272		9.526	10.186	9.809	0.66	0.283	0.377	57.1212	42.8788	1.87316
37R-1	5.0-5.3	607.072	6.991	1.621	12.114	0.467385	8.02927	-1.08	-29.74	8.72011		9.488	10.146	9.822	0.658	0.334	0.324	49.2401	50.7599	4.07565
37R-1	5.3-5.7	607.076	7.171	2.064	15.303	0.576921	9.88837	-1.63	-29.82	10.8587		9.387	10.061	9.814	0.674	0.427	0.247	36.6469	63.3531	6.26459
37R-1	5.7-6.0	607.078	6.944	2.294	17.123	0.658475	11.4261	-1.55	-29.85	11.1415		9.507	10.239	9.977	0.732	0.47	0.262	35.7923	64.2077	7.33643
37R-1	8.0-8.5	607.102	7.375	2.056	14.841	0.552586	9.32457	-1.93	-30.06	10.2252		9.482	10.388	10.031	0.906	0.549	0.357	39.404	60.596	5.65032
37R-1	8.5-9.0	607.103	7.114	2.179	15.759	0.60378	10.2646	-1.89	-29.96	11.0004		9.383	10.42	10.054	1.037	0.671	0.366	35.2941	64.7059	6.64181
37R-1	9.0-9.5	607.112	7.236	2.372	17.527	0.64263	11.2237	-1.43	-29.96	11.8916		9.401	10.504	10.152	1.103	0.751	0.352	31.913	68.087	7.6419
37R-1	9.5-10	607.117	7.17	1.883	13.82	0.512034	8.93134	-0.53	-30.09	11.3556		9.466	10.403	10.076	0.937	0.61	0.327	34.8986	65.1014	5.81443
37R-1	11-11.5	607.133	19.924	1.724	11.262	0.167789	2.61919	0.84	-29.64	11.8395		9.492	9.906	9.806	0.414	0.314	0.1	24.1546	75.8454	1.98653
37R-1	11.5-12	607.138	19.399	1.632	10.362	0.162253	2.4751	0.64	-29.65	11.8223		9.46	9.74	9.677	0.28	0.217	0.063	22.5	77.5	1.9182
37R-1	12-12.5	607.143	24.747	1.823	11.526	0.140556	2.15816	1.09	-29.62	11.899		9.494	10.085	9.952	0.591	0.458	0.133	22.5042	77.4958	1.67248
37R-1	12.5-12.9	607.148	14.987	1.063	7.305	0.134614	2.25857	2.69	-29.83	13.3861		9.455	10.009	9.897	0.554	0.442	0.112	20.2166	79.7834	1.80196
37R-1	12.9-13.4	607.152	20.26	1.283	8.179	0.119552	1.87063	2.42	-29.78	12.4526		9.437	9.726	9.667	0.289	0.23	0.059	20.4152	79.5848	1.48874
37R-1	13.4-13.8	607.157	24.91	1.261	7.47	0.0950652	1.38955	2.41	-29.77	11.6988		9.484	10.03	9.921	0.546	0.437	0.109	19.9634	80.0366	1.11215
37R-1	13.8-14.2	607.16	25.208	1.312	7.607	0.0972295	1.39831	2.11	-29.72	11.3648		9.517	10.07	9.954	0.553	0.437	0.116	20.9765	79.0235	1.10499
37R-1	14.2-14.6	607.163	19.718	1.319	7.403	0.124314	1.73969	1.03	-29.73	10.9978		9.465	9.918	9.821	0.453	0.356	0.097	21.4128	78.5872	1.36718
37R-1	14.6-15	607.168	19.503	1.454	8.361	0.137831	1.98648	0.9	-29.76	11.1749		9.474	9.75	9.688	0.276	0.214	0.062	22.4638	77.5362	1.54024
37R-1	15.0-15.3	607.172	24.645	1.518	8.796	0.117062	1.80812	-0.22	-29.49	12.3071		9.447	10.195	10.043	0.748	0.596	0.152	20.3209	79.6791	1.44069
37R-1	15.3-15.5	607.174	24.301	1.516	8.82	0.118563	1.83872	-0.93	-29.49	5.3218		9.443	10.97	9.967	1.527	0.524	1.003	65.6843	34.3157	0.630967
37R-1	15.5-15.7	607.176	24.31	1.578	8.979	0.123366	1.87117	-1.33	-29.49	12.1807		9.429	9.82	9.743	0.391	0.314	0.077	19.6931	80.3069	1.50268
37R-1	15.7-16.0	607.178	24.076	1.372	7.698	0.108304	1.61981	-1.44	-29.58	12.0393		9.418	9.941	9.839	0.523	0.421	0.102	19.5029	80.4971	1.3039
37R-1	16.0-16.4	607.182	25.563	1.299	7.35	0.0965762	1.45662	-1.34	-29.45	12.2605		9.418	10.054	9.935	0.636	0.517	0.119	18.7107	81.2893	1.18407
37R-1	16.4-16.8	607.187	24.043	1.508	8.974	0.119203	1.8909	-0.63	-29.46	12.6053		9.503	9.951	9.859	0.448	0.356	0.092	20.5357	79.4643	1.50259
37R-1	16.8-17.3	607.19	24.482	1.567	9.045	0.121645	1.87168	-0.74	-29.44	12.2437		9.452	10.064	9.939	0.612	0.487	0.125	20.4248	79.5752	1.48939
37R-1	17.3-17.8	607.195	24.783	1.731	10.043	0.132744	2.05296	-0.99	-29.45	11.9248		9.406	9.869	9.763	0.463	0.357	0.106	22.8942	77.1058	1.58295
37R-1	17.8-18.2	607.2	33.343	2.399	13.682	0.14098	2.0927	-0.85	-29.12	11.5371		9.416	9.82	9.73	0.404	0.314	0.09	22.2772	77.7228	1.62651
37R-1	18.2-18.6	607.203	32.594	2.14	12.842	0.12865	2.00936	-1.83	-29.2	12.2719		9.42	9.672	9.618	0.252	0.198	0.054	21.4286	78.5714	1.57878
37R-1	18.6-19.0	607.207	34.3	2.273	13.675	0.129849	2.03327	-1.95	-29.19	12.0608		9.449	9.758	9.687	0.309	0.238	0.071	22.9773	77.0227	1.56608
37R-1	19.0-19.4	607.212	35.121	2.189	12.95	0.122127	1.88047	-1.92	-29.22	12.1488		9.47	10.034	9.915	0.564	0.445	0.119	21.0993	78.9007	1.4837
37R-1	19.5-19.9	607.217	33.352	2.079	11.872	0.122142	1.81537	-1.6	-29.23	11.4756		9.472	9.981	9.865	0.509	0.393	0.116	22.7898	77.2102	1.40165
37R-1	19.9-20.3	607.221	39.079	1.52	8.24	0.0762137	1.07534	-1.38	-29.23	11.1224		9.435	10.101	9.96	0.666	0.525	0.141	21.1712	78.8288	0.84768
37R-1	20.3-20.7	607.226	38.639	1.392	7.108	0.0705905	0.938176	0.18	-29.2	10.753		9.373	10.012	9.89	0.639	0.517	0.122	19.0923	80.9077	0.759057
37R-1	20.7-21.0	607.229	37.906	1.489	7.867	0.0769697	1.05843	-0.08	-29.26	10.9843		9.426	9.918	9.819	0.492	0.393	0.099	20.122	79.878	0.845457
37R-1	21.5-21.8	607.236	33.686	1.143	6.381	0.0664859	0.966056	0	-29.26	11.2217		9.42	9.846	9.749	0.426	0.329	0.097	22.77	77.23	0.746085
37R-1	21.8-22.0	607.239	35.08	0.921	5.151	0.0514438	0.74885	0.83	-29.12	10.4871		9.418	9.604	9.552	0.186	0.134	0.052	27.957	72.043	0.539494
37R-1	22.0-22.3	607.241	32.289	0.879	4.895	0.0533417	0.773145	1.07	-29.14	10.8082		9.418	9.65	9.591	0.232	0.173	0.059	25.431	74.569	0.576526
37R-1	22.4-22.7	607.246	34.721	1.15	7.539	0.0648991	1.10735	0.5	-28.95	12.6115		9.477	9.661	9.613	0.184	0.136	0.048	26.087	73.913	0.818475
37R-1	22.8-23.1	607.25	36.705	1.041	5.448	0.0555723	0.756963	0.22	-29.19	9.91776		9.413	9.63	9.571	0.217	0.158	0.059	27.1889	72.8111	0.551153
37R-1	23.2-23.6	607.254	37.349	0.787	3.642	0.0412885	0.497306	0.91	-28.97	8.95149		9.412	9.669	9.603	0.257	0.191	0.066	25.6809	74.3191	0.369593
37R-1	23.7-24.0	607.259	34.515	0.556	2.036	0.0315646	0.300838	2.59	-28.61	6.85554		9.416	9.644	9.58	0.228	0.164	0.064	28.0702	71.9298	0.216392
37R-1	24.1-24.4	607.262	39.168	0.685	3.069	0.0342683	0.399603	2.35	-28.94	8.08748		9.514	9.638	9.6	0.124	0.086	0.038	30.6452	69.3548	0.277144
37R-1	24.5-24.8	607.266	40.229	0.592	1.765	0.0288347	0.223753	3.71	-28.75	6.11324		9.509	9.919	9.832	0.41	0.323	0.087	21.2195	78.7805	0.176273
37R-1	24.8-25.0	607.269	32.453	0.376	1.188	0.0227021	0.186691	5.3	-28.35	6.13281		9.41	9.764	9.674	0.354	0.264	0.09	25.4237	74.5763	0.139228
37R-1	29.0-31.0	607.32	35.954	0.451	2.189	0.0461169	0.256783	1.037	-25.777	0.572511					1.1029	0.1134	0.9895	89.718	10.282	0.0264024
37R-1	38.0-39.5	607.408	35.177	0.146	1.1	0.0153549	0.13267	1.24	-26.459	3.7729					0.5542	0.242	0.3122	56.3335	43.6665	0.0579326
37R-1	47.0-48.5	607.497	37.125	0.145	1.69	0.014541	0.194289	2.246	-26.259	4.82938					0.6463	0.2336	0.4127	63.8558	36.1442	0.0702242
37R-1	56.0-58.0	607.59	42.036	0.199	1.508	0.0177371	0.154032	2.095	-25.866	2.48246					0.976	0.279	0.697	71.4139	28.5861	0.0440316
37R-1	62.5-64.0	607.653	30.083	0.187	2.941	0.0234394	0.422302	1.171	-27.458	6.12486					0.6092	0.2071	0.4021	66.0046	33.9954	0.143563
37R-1	77.0-79.0	607.8	32.228	0.213	1.733	0.0250822	0.233695	2.188	-26.852	1.77451					0.9724	0.1852	0.7872	80.9543	19.0457	0.0445087
37R-1	83.0-85.0	607.86	37.226	0.233	1.825	0.0239078	0.214363	2.244	-26.891	2.57204					0.9618	0.2759	0.6859	71.3142	28.6858	0.0614918
37R-1	93.0-95.0	607.96	32.6	0.196	1.187	0.0231152	0.160189	1.485	-26.885	2.57804					0.7524	0.2799	0.4725	62.799	37.201	0.059592
37R-1	105.0-107.0	608.08	34.771	0.221	1.539	0.024597	0.195932	2.121	-26.679	3.67942					0.3938	0.1819	0.2119	53.809	46.191	0.0905028
37R-2	24.0-26.0	608.75	39.571	0.455	3.778	0.0291457	0.265971	3.683	-26.634	6.80552		9.41	9.764	9.674	0.354	0.264	0.09	25.4237	74.5763	0.198351
37R-2	31.0-33.0	608.82	39.815	0.342	2.216	0.021773	0.15505	2.296	-26.794	5.31073		9.41	9.764	9.674	0.354	0.264	0.09	25.4237	74.5763	0.115631

## Sheet: Magnetic data
	sample	depth (mbsf)	IRM (Am²/kg)	IRM30mT/IRM	IRM100mT/IRM	ARM (Am²/kg)	ARM30mT/ARM	χ (10E-8 m3/kg)	S-300 ratio		Thermal demagnetization of saturation IRM	37R-1W-6-8	37R-1W-15-19	37R-1W-31-33	37R-1W-33-35
PETM	37R-1W-5-6	607.07	7.35756e-05	0.476353	0.142545	3.67171e-06	0.492715	5.40377	0.927928		T (°C)	IRM (normalized to RT)	IRM (normalized to RT)	IRM (normalized to RT)	IRM (normalized to RT)
	37R-1W-6-8	607.08	6.133e-05	0.487853	0.148937	3.189e-06	0.516499	4.44751	0.896266		20	1	1	1	1
	37R-1W-9-12	607.11	0.000136325	0.439567	0.128935	6.61735e-06	0.445616	5.25919	0.910448		125	0.695064	0.694328	0.845453	0.837803
	37R-1W-15-19	607.17	0.000139	0.465332	0.141122	5.70338e-06	0.522565	5.37362	0.909366		175	0.569662	0.550857	0.764851	0.763273
	37R-1W-19-21	607.21	0.000117346	0.536552	0.157013	6.03081e-06	0.514305	4.93188	0.85782		250	0.425885	0.454245	0.626056	0.621934
Selandian	37R-1W-27-29	607.29	3.98026e-06	0.50324	0.134579	3.23684e-07	0.523374	0.182051	0.896341		300	0.397993	0.400907	0.552509	0.545253
	37R-1W-31-33	607.33	4.24635e-06	0.532137	0.099187	5.67261e-07	0.42	0.159602	0.901709		330	0.374079	0.367352	0.509184	0.487428
	37R-1W-33-35	607.35	1.78882e-05	0.513146	0.0652493	1.61491e-06	0.412308	0.845953	0.858242		380	0.272682	0.277458	0.391491	0.390536
	37R-1W-45-46	607.47	5.41568e-06	0.490482	0.0786404	6.55582e-07	0.40942	0.183061	0.931408		460	0.212678	0.194468	0.245729	0.252698
	37R-1W-49-50	607.51	5.04587e-06	0.4964	0.0791127	6.31193e-07	0.424419	0.149698	0.975309		520	0.189765	0.144628	0.14041	0.163846
	37R-1W-53-54	607.55	5.80071e-06	0.494202	0.0751626	6.99288e-07	0.412214	0.136569	0.931472		550	0.124818	0.0987178	0.0658436	0.0582256
	37R-1W-65-66	607.67	1.69811e-05	0.540741	0.153463	1.63522e-06	0.407692	0.607105	0.901914		590	-0.00386556	0.00515992	0.0155535	0.00867868
Caption: IRM = saturation isothermal remanent magnetization (acquired in 1T); IRM30mT and IRM100mT are the remanent magnetization after demagnetization of the initial IRM with alternating fields of 30 mT and 100 mT, respectively; ARM = anhysteretic remanent magnetization (acquired in 100 mT alternating field and a bias field of 100 µT); ARM30mT is the residual ARM after demagetizaiton in an alter…

## Sheet: Biomarker and TEX86
Core	Section	Interval		Depth	Dinosteranes	Chlorbactane	Okenane	Isorenieratane	C29ααα sterane	C31ab hopane	Tmax	TEX86	TEX86H	TEX86H	TEX86	BIT	MI	fCren	%GDGT-0	GDGT	GDGT	GDGT	GDGT	GDGT	GDGT
		cm	cm	mbsf	ng/ g TOC	ng/g TOC	ng/g TOC	ng/g TOC	20S/(S+R)	22S/(S+R)	˚C			SST (°C)	SST (°C)					0	1	2	3	Cren	Cren'
36	3	34	35	606.45	1.05399	0.764766	0.29455	0.202281	0.160362	0.168665
36	3	61	62	606.72	1.75595	0.18468	0.196595	0.0536167	0.0311096	0.147075		0.956093	-0.0194996	37.2662	44.4062	0.0530816	0.0719323	0.251123	0.0574076	0.0415711	0.0104321	0.0438109	0.0119466	0.682568	0.171408
36	4	1	2	606.87	0.242847	0.00756291	0.0157375	0.229279	0.0590926	0.268768	435.24	0.951178	-0.0217383	37.1131	44.0785	0.0412782	0.063109	0.256502	0.044458	0.031922	0.0114272	0.0365807	0.0100626	0.686104	0.175987
37	1	3	4	607.05	22.223	0.219407	0.165625	1.09732	0.0849743	0.471561	428	0.976225	-0.0104502	37.8852	45.7483	0.0047248	0.0328752	0.230931	0.0205376	0.0161482	0.00499448	0.0192234	0.00800631	0.770126	0.177846
37	1	10	11	607.12							423	0.981431	-0.00814012	38.0432	46.0954	0	0.0335124	0.241757	0.0148093	0.0115644	0.00406867	0.0213639	0.00769232	0.769322	0.185989
37	1	15	16	607.17	29.6769	0.00595434	0.0218326	0.0859563	0.0506934	0.392423	427	0.973762	-0.0115473	37.8102	45.5841	0.0130932	0.0424493	0.235216	0.0206235	0.0158393	0.0057229	0.0252542	0.0102113	0.752182	0.176925
37	1	19	20	607.21	1.8917	0.0338173	0.0189838	0.13035	0.0921841	0.457115	428	0.97294	-0.0119139	37.7851	45.5293	0.00490392	0.0447194	0.230049	0.0171364	0.0132744	0.00592587	0.0277898	0.010125	0.761361	0.175151
37	1	23	24	607.25	1781.52	7.71761	4.18578	40.007	0.429908	0.572718	424	0.960205	-0.017636	37.3937	44.6803	0.0249548	0.0510582	0.242454	0.0280612	0.0211703	0.00902552	0.0320165	0.00797707	0.733262	0.177782
37	1	31	32	607.33								0.856268	-0.0673901	33.9905	37.7512	0.156889	0.175965	0.137072	0.356414	0.261253	0.0257582	0.0508837	0.0379048	0.471751	0.0646637
37	1	43	44	607.45
37	1	52.5	53	607.545	1750.96	3.04152	1.69554	7.11319	0.447774	0.575098
37	1	70	71	607.72
								average:	0.129761	0.354046	427.54		calibration:	Kim et	Schouten et	>0.3	>0.5	>0.25	>0.67	critical value
														al. (2010)	al. (2002)	O`Brian et al. : Earth-Science Reviews 172 (2017) 224–247

## Sheet: Clay Mineralogy
	Clay minerals				Associated Minerals
Sample depth (mbsf)	IS RO (%)	Illite (%)	Palygorskite (%)	Chlorite (%)	Clinoptilolite	opal CT
607.02	100	0	0	0	absent
607.08	89	3	5	4	absent
607.11	94	2	2	2	abundant
607.15	96	1	2	1	abundant	trace
607.17	95	2	1	2	abundant
607.21	95	2	2	1	abundant
607.24	98	1	0	1	abundant
607.25	98	1	1	1	abundant
607.29	96	2	1	1	abundant
607.33	95	3	0	2	absent
607.35	99	0	0	0	absent
607.42	100	0	0	0	absent
607.47	100	0	0	0	absent
607.51	94	5	0	1	absent
607.55	93	3	2	2	absent
607.61	98	1	1	0	absent
607.67	97	1	1	1	absent

## Sheet: Dinoflagellate Counts
General palynology and dinocyst results nq = non quantifiable num = numerous p = present Percentages of dinoflagelallate cysts are calculated relative to the total dinocyst count Percentages of sporomorphs are calculated relative to the total palynological counts	Leg	Site	Core	section	Interval	mbs	epoch	Slide	Weight (g)		Dinocysts per gram		acritarch	n Apectodinium spp.	n Areoligera cpx sensu Sluijs and Brinkhuis 2009	n Diphyes spp.	n Goniodomidae	n Spiniferites cpx. sensu Sluijs and Brinkhuis, 2009	n Senegalinium cpx. sensu Sluijs and Brinkhuis, 2009	n Cordosphaeridium cpx. sensu Sluijs and Brinkhuis, 2009	n Operculodinium spp.	n other dinocysts	n sporomorphs	n foraminifer lining		total dinocyst	total palynomorphs		% Apectodinium spp.	% n Areoligera cpx sensu Sluijs and Brinkhuis 2009	% Diphyes spp.	% Goniodomidae	% Spiniferites cpx. sensu Sluijs and Brinkhuis, 2009	% Senegalinium cpx. sensu Sluijs and Brinkhuis, 2009	% Cordosphaeridium cpx. sensu Sluijs and Brinkhuis, 2009	% Operculodinium spp.	% other dinocysts	% dinocysts	% sporomorphs	% other
	364	77	36	1	83-84		eocene		9.6345		nq	barren
	364	77	36	2	56-57		eocene		7.4068		nq	barren
	364	77	36	3	8-9		eocene		10.666		nq	barren
	364	77	37	1	2-3		eocene	1+2	1.9987		411.797		1	12.5			12.5	17	2	2	11	5.5	25			62.5	88.5		20	0	0	20	27.2	3.2	3.2	17.6	8.8	70.6215	28.2486	1.12994
	364	77	37	1	7-8		eocene	1+2	2.2034		2522.44		3	13			1	4	2			3	37	3		23	66		56.5217	0	0	4.34783	17.3913	8.69565	0	0	13.0435	34.8485	56.0606	9.09091
	364	77	37	1	18-19		eocene	1+2	1.3053		5063.27		2	113.5	2	4	23	24	12		3	12	25	10		193.5	230.5		58.6563	1.03359	2.06718	11.8863	12.4031	6.20155	0	1.55039	6.20155	83.9479	10.846	5.20607
	364	77	37	1	22-23		eocene	1	1.1214		3751.86			187	1		5	15	5	2	3	14	10	4		232	246		80.6034	0.431034	0	2.15517	6.46552	2.15517	0.862069	1.2931	6.03448	94.3089	4.06504	1.62602
	364	77	37	1	29-31		paleocene	1+2	8.5618		44.5352			9.5	1			3	1	0.5	3	2	3			20	23		47.5	5	0	0	15	5	2.5	15	10	86.9565	13.0435	0
	364	77	37	1	33-35		paleocene		8.2996		nq	barren
	364	77	37	1	89-90		paleocene		14.9425		nq	barren
	364	77	37	1	120-121		paleocene		8.1806		nq	barren
	364	77	37	2	31-32		paleocene		9.223		nq	barren
	364	77	37	2	104-106		paleocene		7.3062		nq	barren
	364	77	37	3	16-17		paleocene		7.7458		nq	barren

## Sheet: Pollen and Spore Counts
		Abundance/statistics/age							Paleoecology			Count sums											Trilete spores																			Monolete spores				Gymnosperm pollen
Sample depth (mbsf)	Age	Pollen and plant spore abundance (grains/g)	Dinoflagellate cyst abundance (grains/g)	Fungal spore abundance (grains/g)	Acritarch abundance (grains/g)	Scolecodont abundance (grains/g)	Diversity (number of pollen and spore species)	D/S ratio (Warny et al. 2003)	Counts of montane forest species	Counts of lowland tropical forest species	Counts of arid tropical scrub species	Dinoflagellate cysts	Acritarch spp.	Fungal spores	Scolecodont spp.	Total pollen/plant spores	Identifiable pollen/plant spores	Unidentifiable pollen/plant spores	Angiosperm pollen	Gymnosperm pollen	Plant spores		Ceratosporites sp. A	Cyathidites minor	Deltoidospora spp.	Echinatisporis sp. A	Foveotriletes crater	Gemmatriletes aff. G. clavatus	Gemmatriletes sp. A	Gleicheniidites senonicus	Hamulatisporis hamulatis	Kuylisporites waterbolkii	Neoraistrickia sp. A	Punctatriletes sp. A	Raestrickia sp. A	Retitriletes sp. A	Retitriletes sp. B	Rugutriletes sp. A	Undulatisporites elsikii	Undulatisporites mineri	Verrucosisporites sp. A	Laevigatosporites haardtii	Microfoveolatosporis cf. M. fromensis	Polypodiisporonites sp. A	Reticuloidosporites pseudomurii	Cycadopites follicularis	Ephedripites eocenipites	Ephedripites (Ephedripites) spp.	Gnetaceaepollenites sp. A
505.88	Ypresian (Early Eocene)	2371	334.498	49.1908	541.099	54.1099	42	0.123636	12	24	3	68	110	10	11	482	300	182	297	3	0																											1	2
507.525		5785.57	648.725	26.4786	1231.25	13.2393	38	0.100823	13	32	3	49	93	2	1	437	300	137	297	3	0																											3
509.165		3533.45	717.219	6.57999	256.619	6.57999	40	0.168731	15	47	2	109	39	1	1	537	300	237	297	3	0																											1	1
510.895		11178	753.042	94.1302	117.663	0	36	0.0631164	9	59	0	32	5	4		475	300	175	293	0	7			1	6
512.235		3537.22	180.471	0	180.471	0	38	0.0485437	18	18	0	30	30			588	300	288	299	0	1												1
514.135		3397.45	579.111	12.8691	205.906	6.43456	40	0.145631	6	47	1	90	32	2	1	528	300	228	296	2	2				2																								1
515.995		4586.27	483.784	9.67568	280.595	19.3514	44	0.0954198	5	26	3	50	29	1	2	474	300	174	294	3	3					1							1									1					1	1	1
517.605		8441.76	328.9	0	146.178	36.5444	34	0.0375	8	42	0	18	8		2	462	300	162	299	0	1				1
519.305		3262.73	201.63	12.22	128.31	6.10999	38	0.0582011	7	28	2	33	21	2	1	534	300	234	297	2	1				1																								2
520.785		13561.3	923.319	115.415	750.197	28.8537	37	0.063745	10	37	2	32	26	4	1	470	300	170	297	2	1																				1								2
522.375		4524.51	516.165	16.1302	306.473	8.06508	40	0.1024	6	44	2	64	38	2	1	561	300	261	298	2	0																												2
523.915		3191.11	430.702	13.0516	143.567	6.52579	46	0.118919	8	42	0	66	22	2	1	489	300	189	300	0	0
525.475		4851.31	345.795	20.3409	284.773	10.1705	40	0.0665362	7	30	1	34	28	2	1	477	300	177	299	1	0																												1
527.075		4677.1	522.276	0	132.518	15.5903	45	0.10045	18	51	1	67	17		2	600	300	300	298	2	0																												1
528.685		1203.72	398.972	13.6013	181.351	11.3344	45	0.248939	9	41	1	176	80	6	5	531	300	231	296	3	1				1																							1
530.235		1305.56	597.597	2.69188	212.658	16.1513	45	0.314003	12	41	2	222	79	1	6	485	300	185	296	4	0																												2
531.755		424.727	313.113	0.987738	99.7615	2.96321	42	0.424364	8	42	5	317	101	1	3	430	300	130	293	7	0																										1	1	3
533.275		1380.86	722.295	8.49758	284.669	4.24879	46	0.343434	9	40	6	340	134	4	2	650	300	350	277	8	15				12							1	1									1						1	5
534.845		366.317	161.63	2.64967	76.8405	3.97451	42	0.306148	17	47	0	244	116	4	6	553	300	253	296	3	1														1
536.385		2398.09	518.375	4.84463	116.271	24.2231	52	0.177741	18	53	2	107	24	1	5	495	300	195	296	3	1				1																								2
537.86		1271.18	377.919	5.28558	84.5692	5.28558	42	0.229167	18	69	1	143	32	2	2	481	300	181	294	2	4				4																								1
539.425		496.463	259.215	3.51478	64.1448	7.90826	46	0.343023	8	29	1	295	73	4	9	565	300	265	291	1	8				3	3							1								1								1
540.885		1179.69	604.385	18.6923	459	0	45	0.338766	8	40	2	291	221	9		568	300	268	285	2	13		1		11																1							1	1
542.605		4268.1	690.429	117.687	980.722	39.2289	37	0.139241	17	14	1	88	125	15	5	544	300	244	298	1	1																				1								1
544.105		2357.56	168.397	22.1575	212.712	8.86301	41	0.0666667	5	70	1	38	48	5	2	532	300	232	298	1	1																			1									1
545.665		2662.64	219.108	14.2897	362.005	19.0529	43	0.0760331	20	10	3	46	76	3	4	559	300	259	296	4	0																										1		2
547.42		949.889	297.28	12.3134	205.809	7.03621	44	0.238364	13	57	5	169	117	7	4	540	300	240	288	9	3		1		2																						1	2	1
548.955		11247.3	712.7	0	757.244	0	39	0.0595903	12	31	0	32	34			505	300	205	298	1	1				1
550.445		1016.94	307.731	0	334.224	0	41	0.232308	15	30	1	151	164			499	300	199	297	2	1					1																							1
551.975		5147.51	720.652	41.1801	360.326	20.5901	29	0.122807	32	13	0	70	35	4	2	500	300	200	300	0	0
553.535		2966.69	281.685	17.9799	359.598	5.9933	45	0.0867159	18	34	0	47	60	3	1	495	300	195	299	0	1				1
555.065		185.885	175.684	2.6447	89.1642	1.13344	47	0.485893	11	47	3	465	236	7	3	492	300	192	294	4	2					1									1													1	2
556.58		910.247	237.456	22.369	302.842	13.7656	48	0.206897	10	38	4	138	176	13	8	529	300	229	287	6	7				1	4																1		1				1	3
558.26		2011.54	226.254	7.07044	123.733	3.53522	34	0.101106	23	20	0	64	35	2	1	569	300	269	300	0	0
559.905		1042.57	350.356	2.12337	97.675	2.12337	35	0.251524	10	76	1	165	46	1	1	491	300	191	299	1	0																												1
561.475		1465.8	263.092	5.01128	245.553	10.0226	42	0.152174	14	57	0	105	98	2	4	585	300	285	294	0	6				6
563.285		1057.22	594.586	17.4878	530.994	9.53882	50	0.359962	10	62	3	374	334	11	6	665	300	365	287	5	8				4		2											1				1				1			3
564.86		492.924	289.562	19.2483	215.079	3.34753	44	0.370053	23	42	8	346	257	23	4	589	300	289	286	9	5				1	1		1													1	1							8
566.515		41.7999	166.514	4.11146	68.0675	2.05573	24	0.799342	1	4	0	729	298	18	9	183	88	95	83	0	5				4		1
567.945		38.5229	5.32926	0.304529	3.50209	1.97944	23	0.121528	5	16	0	35	23	2	13	253	156	97	156	0	0
569.495		308.718	230.562	1.95391	140.682	2.60522	46	0.427536	13	37	5	354	216	3	4	474	300	174	288	6	6				4										1							1						2	3
571.225		3023.02	691.177	27.9263	970.44	90.7606	39	0.18609	26	25	4	99	139	4	13	433	300	133	296	4	0																											3	1
572.745		42.6316	126.929	0.827798	38.9065	4.27695	44	0.748576	6	21	2	920	282	6	31	309	207	102	199	2	6		1		3															1	1								2
574.35		1013.79	591.962	18.6445	349.584	25.6362	35	0.36865	12	35	12	254	150	8	11	435	300	135	284	12	4					2									1							1						4	8
576.035		1175.12	342.03	12.2153	510.601	9.77227	42	0.225443	22	41	7	140	209	5	4	481	300	181	288	8	4		1			2															1						1		6
577.725		1745.27	254.809	6.98108	369.997	0	34	0.1274	36	60	2	73	106	2		500	300	200	293	2	5					2			1												2								2
579.385		271.09	493.663	1.5005	140.046	1.00033	52	0.64552	13	50	9	987	280	3	2	542	300	242	273	11	16				4	5							2								1	2			2			4	5
581.08		33.5058	244.618	0.503847	50.3847	0.251923	25	0.879529	1	3	1	971	200	2	1	133	61	72	59	1	1																				1								1
582.78		60.0075	274.939	7.98579	70.0468	1.59716	34	0.832182	11	13	2	1205	307	35	7	243	155	88	141	2	12				1	3	3				1			1								1			2				2
585.865		20.4999	392.469	2.971	21.6883	0	12	0.95036	1	4	0	1321	73	10		69	29	40	28	0	1						1
589.145		3.92871	142.032	0.25622	5.97848	0	7	0.973084	0	2	0	1663	70	3		46	18	28	18	0	0
592.23		10.6435	98.5986	0.233923	9.23997	0	19	0.90257	1	4	0	843	79	2		91	37	54	30	1	6				2											1					1		1		1
597.095		4995.59	320.472	9.42565	188.513	9.42565	34	0.0602837	46	122	0	34	20	1	1	530	300	230	300	0	0
598.595		2.80751	26.4708	0.935838	5.74872	0	5	0.90411	0	1	0	198	43	7		21	14	7	14	0	0
601.78		0	0	0	0	0	0		0	0	0					0	0		0	0	0
604.375		0.217409	0.108704	0	0.108704	0	0	0.333333	0	0	0	1	1			2	0	2	0	0	0
606.025		0	0	0	0.133405	0	0		0	0	0		1			0	0		0	0	0
606.125		0	0	0	0.122323	0	0		0	0	0		2			0	0		0	0	0
606.505		0.732273	25.5075	0.183068	3.2342	0	3	0.972093	0	0	0	418	53	3		12	5	7	5	0	0
606.605		146.922	414.695	3.53047	49.9698	0	40	0.738395	8	145	0	1527	184	13		541	300	241	299	0	1															1
606.685		5.72345	54.3426	0.421728	6.98863	0.542221	17	0.904714	0	8	0	902	116	7	9	95	66	29	66	0	0
607.035		42.8316	45.1769	2.96242	3.57959	0	29	0.513324	2	31	3	366	29	24		347	191	156	186	4	1																1												3
607.055	PETM	173.911	109.757	13.9129	15.0723	0	21	0.386921	23	52	1	284	39	36		450	300	150	299	1	0																												1
607.095		18.1085	2.6918	0.367063	1.22354	0.122354	18	0.129412	2	10	0	22	10	3	1	148	79	69	79	0	0
607.145		419.721	724.371	490.916	42.2205	5.79496	26	0.63314	18	81	2	875	51	593	7	507	300	207	297	2	1					1																							2
607.175		503.207	711.126	470.029	34.2844	4.4238	31	0.58561	8	85	0	643	31	425	4	455	300	155	297	0	3				1					1											1
607.215		269.317	611.561	57.9978	30.4345	4.01965	36	0.694263	11	71	3	1065	53	101	7	469	300	169	294	4	2					1													1									2	1
607.255		22.6631	1551.93	98.3181	22.3299	0.166641	17	0.985607	3	16	2	9313	134	590	1	136	89	47	85	2	2				1																	1							2
607.345	Paleocene	0.928555	40.9408	0.42207	0	0	5	0.977823	1	0	0	485		5		11	6	5	5	1	0
607.695		0.264967	0	0	0.0662418	0	1	0	0	0	0		1			4	1	3	1	0	0
610.48		0.3216	0.0643199	0.0643199	0.0643199	0	1	0.166667	1	0	0	1	1	1		5	1	4	1	0	0
612.745		1.27774	0	0.127774	0.127774	0	4	0	2	0	0		1	1		10	8	2	6	1	1									1
613.25							0		0	0	0					0	0		0	0	0
613.315							0		0	0	0					0	0		0	0	0
613.375							0		0	0	0					0	0		0	0	0
613.435							0		0	0	0					0	0		0	0	0
613.5							1	0	2	0	0					2	2		0	2	0
613.555							0		0	0	0					0	0		0	0	0
613.615							0		0	0	0					0	0		0	0	0
613.675							0		0	0	0					0	0		0	0	0
613.735							0		0	0	0					0	0		0	0	0
613.795							1	0	0	0	1					1	1		0	1	0																											1
613.855							0		0	0	0					0	0		0	0	0
613.915							0		0	0	0					0	0		0	0	0
613.975							0		0	0	0					0	0		0	0	0
614.045							0		0	0	0					0	0		0	0	0
614.105							1	0	0	0	0					1	1		0	0	1				1
614.165							1	0	0	0	0					1	1		0	0	1				1
614.215							0		0	0	0					0	0		0	0	0
614.23							0		0	0	0					0	0		0	0	0
614.285							0		0	0	0					0	0		0	0	0
614.345							2	0	0	0	0					3	2	1	0	0	2				2
614.395							0		0	0	0					0	0		0	0	0
614.455							0		0	0	0					0	0		0	0	0
614.5							0		0	0	0					0	0		0	0	0
614.555							0		0	0	0					0	0		0	0	0
614.62							0		0	0	0					0	0		0	0	0
614.685							0		0	0	0					0	0		0	0	0
614.745							0		0	0	0					0	0		0	0	0
614.805							0		0	0	0					0	0		0	0	0
614.87							0		0	0	0					0	0		0	0	0
614.935							1	0	0	0	0					1	1		0	0	1				1
614.995							0		0	0	0					0	0		0	0	0
615.03		1.59881	0	0.399702	0.199851	0	2	0	0	0	0		1	2		8	5	3	5	0	0
615.055							0		0	0	0					0	0		0	0	0
615.115							0		0	0	0					0	0		0	0	0
615.165							0		0	0	0					0	0		0	0	0
615.225							0		0	0	0					0	0		0	0	0
615.285							0		0	0	0					0	0		0	0	0
615.37							0		0	0	0					0	0		0	0	0
615.435							0	0	0	0	0					1	0	1	0	0	0
615.495							1	0	0	0	0					2	2		0	0	2				2
615.555							0		0	0	0					0	0		0	0	0
615.62							0		0	0	0					0	0		0	0	0
615.685							0		0	0	0					0	0		0	0	0
615.765							0		0	0	0					0	0		0	0	0
615.825							0		0	0	0					0	0		0	0	0
615.88							0		0	0	0					0	0		0	0	0
615.935							0		0	0	0					0	0		0	0	0
615.995							0		0	0	0					0	0		0	0	0
616.045							0		0	0	0					0	0		0	0	0
616.105							0		0	0	0					0	0		0	0	0
616.165							0		0	0	0					0	0		0	0	0
616.235							0		0	0	0					0	0		0	0	0
616.36							0		0	0	0					0	0		0	0	0
616.4							0		0	0	0					0	0		0	0	0
616.435							0		0	0	0					0	0		0	0	0
616.465							0		0	0	0					0	0		0	0	0
616.505							0		0	0	0					0	0		0	0	0
616.545							0		0	0	0					0	0		0	0	0
616.585							0		0	0	0					0	0		0	0	0
616.625							0		0	0	0					0	0		0	0	0
616.665							0		0	0	0					0	0		0	0	0
616.705							0		0	0	0					0	0		0	0	0
616.735							0		0	0	0					0	0		0	0	0
616.775							0		0	0	0					0	0		0	0	0
616.815							0		0	0	0					0	0		0	0	0
616.855							0		0	0	0					0	0		0	0	0
616.895							0		0	0	0					0	0		0	0	0
616.935							0		0	0	0					0	0		0	0	0
616.98							0		0	0	0					0	0		0	0	0
617.025							0		0	0	0					0	0		0	0	0
617.065							0		0	0	0					0	0		0	0	0
617.105							0		0	0	0					0	0		0	0	0
617.145							0		0	0	0					0	0		0	0	0
617.185							0		0	0	0					0	0		0	0	0
617.225							0		0	0	0					0	0		0	0	0
617.295							0	1	0	0	0	5				0	0		0	0	0
617.335							0	1	0	0	0	3				0	0		0	0	0
[truncated: 108 more columns]

## Sheet: Pollen and Spore Taxonomy
Fossil Taxon	Aperture/Pollen Type	Botanical Affinity	Paleoecology	Present in Paleogene South America?	Present in Paleogene United States?
Ceratosporites sp. A	Trilete	Selaginellaceae	Lowland tropical forest
Cyathidites minor	Trilete	Polypodiopsida		Yes	Yes
Deltoidospora spp.	Trilete	Polypodiidae, possibly Acrostichum	Estuarine?	Yes	Yes
Echinatisporis sp. A	Trilete	Selaginellaceae	Lowland tropical forest
Foveotriletes crater	Trilete	Cnemidaria (Cyatheaceae)	Montane forest	No	No
Gemmatriletes aff. G. clavatus	Trilete	Bryophyta/Pteridophyta sensu lato
Gemmatriletes sp. A	Trilete	Bryophyta/Pteridophyta sensu lato
Gleicheniidites senonicus	Trilete	Gleicheniaceae	Montane forest?	Yes	Yes
Hamulatisporis hamulatis	Trilete	Lycopodiaceae	Lowland tropical forest?	No	Yes
Kuylisporites waterbolkii	Trilete	Cnemidaria (Cyatheaceae)	Montane forest	Yes	Yes
Neoraistrickia sp. A	Trilete	Selaginellaceae	Lowland tropical forest
Punctatriletes sp. A	Trilete	Bryophyta/Pteridophyta sensu lato
Raistrickia sp. A	Trilete	Selaginellaceae	Lowland tropical forest
Retitriletes sp. A	Trilete	Lycopodiaceae	Lowland tropical forest?
Retitriletes sp. B	Trilete	Lycopodiaceae?
Rugutriletes sp. A	Trilete	Polypodiaceae?	Lowland tropical forest?
Undulatisporites elsikii	Trilete	Polypodiaceae		No	Yes
Undulatisporites mineri	Trilete	Polypodiaceae		No	No
Verrucosisporites sp. A	Trilete	Selaginellaceae?
Laevigatosporites haardtii	Monolete	Polypodiales or Iosetaceae		Yes	Yes
Microfoveolatosporis cf. M. fromensis	Monolete	Schizaeaeceae
Polypodiisporonites sp. A	Monolete	Polypodiaceae or Schizaeaceae	Lowland tropical forest?
Reticuloidosporites pseudomurii	Monolete	Bryophyta/Pteridophyta sensu lato		No	Yes
Class Pinopsida	Gymnosperm Pollen	Pinopsida	Montane forest	Yes	Yes
Cycadopites follicularis	Gymnosperm Pollen	Cycadaceae	Lowland tropical forest	Yes	Yes
Ephedripites (Ephedripites) spp.	Gymnosperm Pollen	Ephedraceae	Arid tropical scrub	Yes	Yes
Ephedripites eocenipites	Gymnosperm Pollen	Ephedraceae	Arid tropical scrub	Yes	Yes
Gnetaceaepollenites sp. A	Gymnosperm Pollen	Ephedraceae	Arid tropical scrub	Yes	Yes
Gnetaceaepollenites sp. B	Gymnosperm Pollen	Ephedraceae	Arid tropical scrub
Retipollenites? sp. A	Inaperturate
Arecipites tenuiexinous	Monocolpate	Arecaceae	Arid tropical scrub?	Yes	Yes
Clavamonocolpites sp. A	Monocolpate
Echimonocolpites chicxulubensis	Monocolpate/Zonacolpate?	Arecaceae
Liliacidites sp. A	Monocolpate
Liliacidites sp. B	Trichotomocolpate	Arecaceae?
Liliacidites variegatus	Monocolpate	Arecaceae?		Yes	Yes
Monocolpopollenites cf. M. tranquilloides	Monocolpate	Arecaceae/Cycadophyta?
Monocolpopollenites tranquillus	Monocolpate	Arecaceae?		No	Yes
Rugumonocolpites sp. A	Monocolpate
Rugumonocolpites sp. B	Monocolpate
Rugumonocolpites sp. C	Monocolpate/ Trichotomocolpate	Arecaceae/Liliaceae?
Clavatricolpites aff. C. gracilis	Tricolpate
Clavatricolpites sp. A	Tricolpate
Cupuliferoidaepollenites spp.	Tricolpate	Fabaceae/Fagaceae?
Discoidites sp. A	Tricolpate	Tilioideae (Malvaceae)	Estuarine
Echitricolpites sp. A	Tricolpate
Eucommia? sp. A	Tricolpate	Eucommiaceae?	Montane forest?
Fraxinoipollenites spp.	Tricolpate
Insulapollenites aff. I rugulatus	Tricolpate	Sapindaceae/Myrtaceae?
Psilatricolpites sp. A	Tricolpate
Reticulataepollis sp. A	Tricolpate	Euphorbiaceae/Nyctaginaceae/Oleaceae?
Retitrescolpites anguloluminosus	Tricolpate	Hamamelidaceae/Oleaceae?		No	Yes
Retitrescolpites sp. A	Tricolpate
Retitrescolpites sp. B	Tricolpate
Retitrescolpites sp. C	Tricolpate	Elaeagnaceae/Sapindaceae?
Retitricolpites sp. A	Tricolpate
Retitricolpites sp. B	Tricolpate
Retitricolpites sp. C	Tricolpate
Rousea sp. A	Tricolpate	Salicaceae
Scabratricolpites sp. A	Tricolpate
Scabratricolpites sp. B	Tricolpate
Spirosyncolpites spiralis	Tricolpate	Fabaceae		Yes	No
Striatopollis grahamii	Tricolpate	Crudia (Fabaceae)	Lowland tropical forest
Tricolpites hians	Tricolpate	Platanaceae?		No	Yes
Tricolpites sp. A	Tricolpate
Verrutricolpites sp. A	Tricolpate
Verrutricolpites sp. B	Tricolpate
Basopollis sp. A	Tricolporate	Normapolles
Boehlensipollis? sp. A	Tricolporate	Elaeagnaceae
Bombacacidites bombaxoides	Tricolporate	Bombacoideae (Malvaceae)	Lowland tropical forest	No	Yes
Bombacacidites brevis	Tricolporate	Bombacoideae (Malvaceae)	Lowland tropical forest	Yes	No
Bombacacidites nacimientoensis	Tricolporate	Bombacoideae (Malvaceae)	Lowland tropical forest	Yes	Yes
Bombacacidites nanobrochatus	Tricolporate	Bombacoideae (Malvaceae)	Lowland tropical forest	Yes	Yes
Bombacacidites sp. A	Tricolporate	Bombacoideae (Malvaceae)	Lowland tropical forest
Bombacacidites sp. B	Tricolporate	Bombacoideae (Malvaceae)	Lowland tropical forest
Echitricolporites sp. A	Tricolporate
Ilexpollenites cf. I. verrucatus	Tricolporate	Aquifoliaceae
Intratriporopollenites spp.	Tricolporate	Malvaceae	Montane forest?
Margocolporites sp. A	Tricolporate	Caesalpinioideae (Fabaceae)	Lowland tropical forest
Margocolporites sp. B	Tricolporate
Margocolporites vanwijhei	Tricolporate	Caesalpinioideae (Fabaceae)	Lowland tropical forest	Yes	Yes
Margocolporites? sp. C	Tricolporate
Psilatricolporites sp. A	Tricolporate
Punctatricolporites sp. A	Tricolporate
Retitricolporites sp. A	Tricolporate
Retitricolporites sp. B	Tricolporate
Retitricolporites sp. C	Tricolporate
Retitricolporites sp. D	Tricolporate
Rhuspollenites sp. A	Tricolporate	Anacardiaceae?
Rugutricolporites aff. R. felix	Tricolporate
Rugutricolporites sp. A	Tricolporate
Scabratricolporites sp. A	Tricolporate
Scabratricolporites sp. B	Tricolporate
Striatricolporites aff. S. conspicuus	Tricolporate	Crudia (Fabaceae)
Striatricolporites sp. A	Tricolporate
Syncolporites sp. A	Tricolporate	Myrtaceae?
Syncolporites? sp. B	Tricolporate
Clavastephanocolpites sp. A	Stephanocolpate
Polygalaceae? type A	Stephanocolpate
Psilastephanocolpites sp. A	Stephanocolpate
Retistephanocolpites sp. A	Stephanocolpate
Psilastephanocolporites hammenii	Stephanocolporate	Cedrela (Meliaceae)	Lowland tropical forest
Stephanocolporate type A	Stephanocolporate
Milfordia hungarica	Monoporate	Restionaceae	Estuarine	No	Yes
Milfordia minima	Monoporate	Restionaceae	Estuarine	Yes	Yes
Monoporopollenites annulatus	Monoporate	Poaceae?	Arid tropical scrub?	Yes	Yes
Betulaceae/Myricaceae type	Triporate	Betulaceae/Myricaceae
Betula? sp. A	Triporate	Betulaceae
Brosipollis aff. B. striata	Triporate	Bursera (Burseraceae)	Lowland tropical forest
Brosipollis reticulatus	Triporate	Bursera (Burseraceae)	Lowland tropical forest
Brosipollis striata	Triporate	Bursera (Burseraceae)	Lowland tropical forest	No	Yes
Caryapollenites veripites	Triporate	Carya (Juglandaceae)	Montane forest	No	Yes
Corsinipollenites oculusnoctis	Triporate	Onagraceae		Yes	Yes
Corsinipollenites parviangulus	Triporate	Hauya? (Onagraceae)	Montane forest?	No	Yes
Cranwellipollis? sp. A	Triporate	Proteaceae
Cricotriporites sp. A	Triporate	Cannabaceae?
Echitriporites sp. A	Triporate
Echitriporites sp. B	Triporate
Gemmatriporites sp. A	Triporate
Momipites amplus	Triporate	Juglandaceae	Montane forest?	No	Yes
Momipites coryloides	Triporate	Juglandaceae	Montane forest?	No	Yes
Momipites triradiatus	Triporate	Juglandaceae	Montane forest?	No	Yes
Psilatriporites sp. A	Triporate	Proteaceae/Sapindaceae?
Retitriporites sp. A	Triporate	Fabaceae?
Scabratriporites redundans	Triporate			Yes	No
Subtriporopollenites cf. S. nanus	Triporate	Juglandaceae	Montane forest?
Trivestibulopollenites sp. A	Triporate	Betulaceae
Alnus verus	Stephanoporate	Alnus (Betulaceae)	Montane forest	No	Yes
Malvacipollis spp. (Euphorbiaceae type)	Stephanoporate	Euphorbiaceae	Lowland tropical forest	Yes	Yes
Malvacipollis? sp. A (Malvaceaae type)	Stephanoporate	Malvaceae?
Scabrastephanoporites variabilis	Stephanoporate	Cannabaceae/Ulmaceae?
Ulmipollenites krempii	Stephanoporate	Ulmaceae	Montane forest	Yes	Yes
Chenopodipollis sp. A	Pantoporate	Amaranthaceae	Estuarine?
Psilaperiporites sp. A	Pantoporate	Caryophyllaceae?
Psilaperiporites suarezi	Pantoporate
Retitetradites sp. A	Tetrad/tricolpate

## Sheet: Nannofossil Data
/* DATA DESCRIPTION:
Citation:	IODP Expedition 364 Scientists (2018): Nannofossils of IODP Hole 364-M0077A. PANGAEA, https://doi.org/10.1594/PANGAEA.886117
Related to:	Gulick, Sean; Morgan, C L; Mellett, Claire; Green, S L; Bralower, Timothy J; Chenot, Elise; Christeson, Gail; Claeys, Philippe; Cockell, Charles; Coolen, M J L; FerriÃ¨re, Ludovic; Gebhardt, Catalina; Goto, Kazuhisha; Jones, Heather; Kring, David; Lofi, Johanna; Lowery, Chris; Ocampo-Torres, RubÃ©n; Perez-Cruz, Ligia; Pickersgill, A E; Poelchau, Michael; Rae, Auriol; Rasmussen, Cornelia; Rebolled…
Project(s):	Integrated Ocean Drilling Program / International Ocean Discovery Program (IODP) (URI: http://www.iodp.org/)
Coverage:	LATITUDE: 21.450150 * LONGITUDE: -89.949367
	DATE/TIME START: 2016-07-04T00:00:00 * DATE/TIME END: 2016-07-04T00:00:00
	MINIMUM ELEVATION: -19.8 m * MAXIMUM ELEVATION: -19.8 m
Event(s):	364-M0077A (Chicx-03B) * LATITUDE: 21.450150 * LONGITUDE: -89.949367 * DATE/TIME: 2016-07-04T00:00:00 * ELEVATION: -19.8 m * IGSN: hdl:10273/IBCR0364EHB0001 * LOCATION: Golf of Mexico * CAMPAIGN: Exp364 * BASIS: Myrtle (URI: http://www.montco.com/MO/)
Parameter(s):	Sample code/label (Sample label) * PI: IODP Expedition 364 Scientists
	Abundance (Abund) * PI: IODP Expedition 364 Scientists
	Preservation (Preserv) * PI: IODP Expedition 364 Scientists
	Discoaster barbadiensis (D. barbadiensis) * PI: IODP Expedition 364 Scientists
	Discoaster elegans (D. elegans) * PI: IODP Expedition 364 Scientists
	Discoaster lodoensis (D. lodoensis) * PI: IODP Expedition 364 Scientists
	Discoaster sublodoensis (D. sublodoensis) * PI: IODP Expedition 364 Scientists
	Discoaster multiradiatus (D. multiradiatus) * PI: IODP Expedition 364 Scientists
	Discoaster falcatus (D. falcatus) * PI: IODP Expedition 364 Scientists
	Discoaster salisburgensis (D. salisburgensis) * PI: IODP Expedition 364 Scientists
	Discoaster mohleri (D. mohleri) * PI: IODP Expedition 364 Scientists
	Discoaster kuepperi (D. kuepperi) * PI: IODP Expedition 364 Scientists
	Discoaster deflandrei (D. deflandrei) * PI: IODP Expedition 364 Scientists
	Discoaster lenticularis (D. lenticularis) * PI: IODP Expedition 364 Scientists
	Fasciculithus tympaniformis (F. tympaniformis) * PI: IODP Expedition 364 Scientists
	Nannotetrina spp. (Nannotetrina spp.) * PI: IODP Expedition 364 Scientists
	Fasciculithus alanii (F. alanii) * PI: IODP Expedition 364 Scientists * COMMENT: Fasciculithus alanii group
	Fasciculithus schaubii (F. schaubii) * PI: IODP Expedition 364 Scientists * COMMENT: Fasciculithus schaubii group
	Zygrhablithus bijugatus (Z. bijugatus) * PI: IODP Expedition 364 Scientists
	Coccolithus cavus (C. cavus) * PI: IODP Expedition 364 Scientists
	Coccolithus pelagicus (C. pelagicus) * PI: IODP Expedition 364 Scientists
	Ericsonia formosa (E. formosa) * PI: IODP Expedition 364 Scientists
	Ericsonia subpertusa (E. subpertusa) * PI: IODP Expedition 364 Scientists
	Ericsonia robusta (E. robusta) * PI: IODP Expedition 364 Scientists
	Toweius crassus (T. crassus) * PI: IODP Expedition 364 Scientists
	Toweius callosus (T. callosus) * PI: IODP Expedition 364 Scientists
	Toweius eminens (T. eminens) * PI: IODP Expedition 364 Scientists
	Toweius pertusus (T. pertusus) * PI: IODP Expedition 364 Scientists
	Toweius gammation (T. gammation) * PI: IODP Expedition 364 Scientists
	Toweius spp. (Toweius spp.) * PI: IODP Expedition 364 Scientists * COMMENT: Little
	Reticulofenestra dictyoda (R. dictyoda) * PI: IODP Expedition 364 Scientists
	Prinsius bisulcus (P. bisulcus) * PI: IODP Expedition 364 Scientists
	Biscutum spp. (Biscutum spp.) * PI: IODP Expedition 364 Scientists
	Cruciplacolithus primus (C. primus) * PI: IODP Expedition 364 Scientists
	Cruciplacolithus intermedius (C. intermedius) * PI: IODP Expedition 364 Scientists
	Cruciplacolithus tenuis (C. tenuis) * PI: IODP Expedition 364 Scientists
	Chiasmolithus bidens (C. bidens) * PI: IODP Expedition 364 Scientists
	Chiasmolithus solitus (C. solitus) * PI: IODP Expedition 364 Scientists
	Chiasmolithus consuetus (C. consuetus) * PI: IODP Expedition 364 Scientists
	Chiasmolithus danicus (C. danicus) * PI: IODP Expedition 364 Scientists
	Chiasmolithus danicus (C. danicus) * PI: IODP Expedition 364 Scientists * COMMENT: Intermediate Chiasmolithus danicus/Cruciplacolithus intermedius
	Campylosphaera dela (C. dela) * PI: IODP Expedition 364 Scientists
	Heliolithus kleinpellii (H. kleinpellii) * PI: IODP Expedition 364 Scientists
	Sphenolithus moriformis (S. moriformis) * PI: IODP Expedition 364 Scientists
	Sphenolithus radians (S. radians) * PI: IODP Expedition 364 Scientists
	Sphenolithus editus (S. editus) * PI: IODP Expedition 364 Scientists
	Sphenolithus anarrhopus (S. anarrhopus) * PI: IODP Expedition 364 Scientists
	Thoracosphaera spp. (Thoracosphaera spp.) * PI: IODP Expedition 364 Scientists
	Braarudosphaera spp. (Braarudosphaera spp.) * PI: IODP Expedition 364 Scientists
	Micrantholithus spp. (Micrantholithus spp.) * PI: IODP Expedition 364 Scientists
	Helicosphaera lophota (H. lophota) * PI: IODP Expedition 364 Scientists
	Helicosphaera seminulum (H. seminulum) * PI: IODP Expedition 364 Scientists
	Coccolithites cribellum (C. cribellum) * PI: IODP Expedition 364 Scientists
	Chiasmolithus grandis (C. grandis) * PI: IODP Expedition 364 Scientists
	Neococcolithes dubius (N. dubius) * PI: IODP Expedition 364 Scientists
	Lophodolithus nascens (L. nascens) * PI: IODP Expedition 364 Scientists
	Triquetrorhabdulus inversus (T. inversus) * PI: IODP Expedition 364 Scientists
	Ellipsolithus bollii (E. bollii) * PI: IODP Expedition 364 Scientists
	Tribrachiatus orthostylus (T. orthostylus) * PI: IODP Expedition 364 Scientists
	Neocrepidolithus spp. (Neocrepidolithus spp.) * PI: IODP Expedition 364 Scientists
	Neocrepidolithus neocrassus (N. neocrassus) * PI: IODP Expedition 364 Scientists
	Ellipsolithus macellus (E. macellus) * PI: IODP Expedition 364 Scientists
	Markalius inversus (M. inversus) * PI: IODP Expedition 364 Scientists
	Pontosphaera spp. (Pontosphaera spp.) * PI: IODP Expedition 364 Scientists
	Prinsius tenuiculum (P. tenuiculum) * PI: IODP Expedition 364 Scientists
	Cyclagelosphaera reinhardtii (C. reinhardtii) * PI: IODP Expedition 364 Scientists
	Placozygus sigmoides (P. sigmoides) * PI: IODP Expedition 364 Scientists
	Neochiastozygus modestus (N. modestus) * PI: IODP Expedition 364 Scientists
	Neochiastozygus spp. (Neochiastozygus spp.) * PI: IODP Expedition 364 Scientists
	Watznaueria barnesiae (W. barnesiae) * PI: IODP Expedition 364 Scientists
	Retecapsa surirella (R. surirella) * PI: IODP Expedition 364 Scientists
	Retecapsa conica (R. conica) * PI: IODP Expedition 364 Scientists
	Prediscosphaera stoveri (P. stoveri) * PI: IODP Expedition 364 Scientists
	Prediscosphaera cretacea (P. cretacea) * PI: IODP Expedition 364 Scientists
	Cribrosphaerella ehrenbergii (C. ehrenbergii) * PI: IODP Expedition 364 Scientists
	Manivitella pemmatoidea (M. pemmatoidea) * PI: IODP Expedition 364 Scientists
	Tranolithus orionatus (T. orionatus) * PI: IODP Expedition 364 Scientists
	Eiffellithus turriseiffelii (E. turriseiffelii) * PI: IODP Expedition 364 Scientists
	Micula concava (M. concava) * PI: IODP Expedition 364 Scientists
	Micula decussata (M. decussata) * PI: IODP Expedition 364 Scientists
	Micula murus (M. murus) * PI: IODP Expedition 364 Scientists
	Quadrum gartneri (Q. gartneri) * PI: IODP Expedition 364 Scientists
	Lithraphidites quadratus (L. quadratus) * PI: IODP Expedition 364 Scientists
License:	Creative Commons Attribution 3.0 Unported (CC-BY-3.0)
Size:	2073 data points
*/
Sample label	Abund	Preserv	D. barbadiensis	D. elegans	D. lodoensis	D. sublodoensis	D. multiradiatus	D. falcatus	D. salisburgensis	D. mohleri	D. kuepperi	D. deflandrei	D. lenticularis	F. tympaniformis	Nannotetrina spp.	F. alanii	F. schaubii	Z. bijugatus	C. cavus	C. pelagicus	E. formosa	E. subpertusa	E. robusta	T. crassus	T. callosus	T. eminens	T. pertusus	T. gammation	Toweius spp.	R. dictyoda	P. bisulcus	Biscutum spp.	C. primus	C. intermedius	C. tenuis	C. bidens	C. solitus	C. consuetus	C. danicus	C. danicus (Intermediate Chiasmolithus da...)	C. dela	H. kleinpellii	S. moriformis	S. radians	S. editus	S. anarrhopus	Thoracosphaera spp.	Braarudosphaera spp.	Micrantholithus spp.
Mud	C	M	F		R	R					R							R		R	C			R						C							R	R			F		F	R	R			R
364-M0077A-1R-1, 8-9	A	M	Fr		Fr	F					F		R					Fr		Fr	Fr			R				Fr	Fr	Fr							R	R			Fr		Fr	Fr
364-M0077A-1R-CC	F	P	R		R								R					R		F	R			R				R		F											R		R	R				R
364-M0077A-2R-CC	C	P	R		R	R												R		R	R			R				R		F											R		R	R
364-M0077A-3R-1, 44-45	A	P/M	Fr		R	R?					R		F					Fr		Fr	Fr			R				R	Fr	C							R	R			Fr		Fr	F
364-M0077A-3R-1, 84-85	C	P	F		R	R?					R	R	R					R		F	F			R			R	R	R	F							R	R			R		R	R			R
364-M0077A-4R-2, 37-38	A	P/M	C		Fr	R					R	R	R					Fr		C	Fr			R				Fr	C	C						R	R	R			Fr		C	Fr
364-M0077A-4R-3, 39	C	P	F		R						R							R		R	F									C							R				R		R	R	R			R
364-M0077A-4R-3, 77	C	P	F		R						F		R					R		R	F			R						F											R		R	R
364-M0077A-5R-2, 109-110	F	P	R		R													R		R	R																R										R
364-M0077A-5R-2, 119	C	P	F		R						R	R						F		R	R			R				R		F							R						F	R
364-M0077A-6R-1, 143-144	C	P	Fr		R	R?					R							Fr		Fr	Fr			?			Fr		R	Fr						R	F				F		Fr
364-M0077A-6R-1, 152	F	P	R		R						R							R		R	R			R				R									R						F	R
364-M0077A-6R-CC	C	P	R		R						R	R						F		R				R	R		R			F							R	R			R		F	R	R
364-M0077A-7R-2, 30-32	C	M	F		R	R?					F		F					R	R	Fr	Fr			R	R		Fr	R	R	Fr							R	R			R		Fr	R	F
364-M0077A-7R-3, 60	C	P	R		R						R							R		F	R			R	R					R								R			R		F	R
364-M0077A-7R-3, 64	F	P	R		R															R	R			R						R							R				R		R					R
364-M0077A-8R-2, 92-94	Fr	P	R															R		Fr	R						Fr			R							R				R		R	R	R
364-M0077A-8R-3, 81	F	P	R															R		R	R			R						R								R			R		R
364-M0077A-9R-3, 73	R	P	R		R															R	R			R						R											R		R	R
364-M0077A-10R-1, 56-58	C	M	Fr		Fr	R					R	R			R			Fr		Fr	Fr			R	R		R	F	Fr	R						R	R	R			R		Fr	R	R
364-M0077A-10R-2, 93-94	C	M	R		Fr	?					F				R			Fr	R	Fr	Fr		R		R		R	R	Fr	R						R	R	R			Fr		Fr	F	R		R	R
364-M0077A-10R-2, 153	F	P	R		R															R	R			R	R		R			R													R
364-M0077A-11R-1, 100-102.5	Fr	P	R		F						F		R					R	F	Fr	Fr			R	R		R	R	Fr	R						R		R			R		Fr	R	R
364-M0077A-11R-3, 39	C	P	R		R						R							R		R				R	R		R	R	C	R							R	R			R		C	R
364-M0077A-12R-2, 7	F	P	R		F						R							R		F	F				R			R	C								R	R			R
364-M0077A-12R-2, 109-111.5	A	M	Fr		Fr						Fr							Fr	Fr	Fr	Fr		R	R	R		Fr	R	Fr	R						R	R	R			F		Fr	Fr	R		R
364-M0077A-12R-CC	C	P	R		R						R							R	R	R	R				R			R										R			R		F	R
364-M0077A-13R-2, 80-82.5	C	P	R		R						R							R	Fr	R	R			R	R		Fr	R	Fr	R								R			R		Fr	Fr			R
364-M0077A-13R-3, 73	C	P	R		R													R		F	F								F									R			R		F	R
364-M0077A-13R-CC	F	P	R		R						R							R		R	R								C												R		R	R
364-M0077A-14R-1, 151			R		R	1														F	F				R		R	R	F									R			R		F	R
364-M0077A-14R-2, 82-84	Fr	P	R		R						R							R	F	R	R			R	F		F	R	Fr									R			R		R	R				R	R
364-M0077A-14R-CC	C	P	R		R													F	R	R	R			1	R			R										R			R		R
364-M0077A-15R-2, 20-21		P	Fr		Fr		?				R							R	Fr	Fr	Fr			R	R		Fr	R	Fr	R						R		R			Fr		R	R	R		R
364-M0077A-15R-3, 13-15	C	P	R		F													F	R	R	R				R		R	R									R				R		F	R	R
364-M0077A-15R-CC	C	P	R		F						R							F	F	R	F				R		R	R									R	R			R		F	R
364-M0077A-16R-1, 67-69	A	M	Fr		R						Fr							R	Fr	Fr	Fr			R	R		Fr	F	Fr	R						R	R				Fr		Fr	Fr	R		R
364-M0077A-16R-3,67	R	P			F						R							F	F	F	F							R									R	R			R				R
364-M0077A-17R-2, 60-62	A	M	Fr		Fr						R		R					Fr	Fr	Fr	Fr		R	R	R		Fr	R	C							R	R	R			F		Fr	Fr			R
364-M0077A-17R-3, 0-1	C	P	F		R						R							F	R	F	F						R	R	R								R	R
364-M0077A-18R-2, 56-58	C	M	Fr		Fr						R							Fr	Fr	Fr	Fr			R	R		Fr	F	Fr	?						R	R	R			F		Fr	R			R
364-M0077A-18R-CC	A	M	F		F						R							F	F	F	F						R	R	R									R
364-M0077A-19R-2, 62-64	A	M	Fr		C						R	R						C	C	Fr	C		R	R			R	F	C							R	R	Fr			Fr		Fr	Fr			F
364-M0077A-19R-CC	R	P	R		R													R		R	R																	R			R		R	R
364-M0077A-20R-2, 7-9.5	C	P	Fr		F						R							Fr	Fr	R	Fr		R	R	R		R	R	Fr	R						R	R	R			Fr		R	Fr			R
364-M0077A-20R-CC	P	P	R		R															R	R																				R
364-M0077A-21R-2, 44-46.5	C	P	Fr		Fr						R							Fr	Fr	Fr	Fr			R	R		R		Fr	R								R			Fr		Fr	R			R
364-M0077A-21R-CC??	R	P	R		R							R								R	R				R			R	R												R		R	R
364-M0077A-21R-CC	A	M	F		R						R							R	F	F	F						F		F									R			R		F	R
364-M0077A-22R-2, 35-37.5	A	P	C		Fr						R							Fr	Fr	Fr	C			R	R			R	Fr							R		R			Fr		Fr	Fr	R		R
364-M0077A-22R-CC	A	M	F		R						R							R	F	F	F						F		F									R			F		F	R
364-M0077A-23R-2, 88-91.5	A	M	C		Fr						R	R						Fr	C	Fr	Fr			R	R		F	R	Fr	1						R					Fr		Fr	Fr	R		R
364-M0077A-23R-CC	C	M	R		F						R							F	F	F	F				R		F		F									R			F		C	R
364-M0077A-24R-1, 56-58.5	F	P	F															R	R	F	F			R			F		F												R		R	F			R
364-M0077A-24R-CC	F	P	R		R						R							R	R	R	F				R		R										R						R	F	R
364-M0077A-25R-2, 50-52.5	C	P	Fr		F						R							R	F	Fr	Fr		R		Fr		Fr		Fr	1?						R		R			R		Fr	F	R		F	R	R
364-M0077A-25-CC	R	P	R		R						R							R	R	R	R						R		R												R		R	R
364-M0077A-26R-1, 82.5-85	C	P	Fr		Fr						R							R	R	Fr	Fr		R	?	R		R	R	Fr	1?											R		R	F	R		R
364-M0077A-26R-CC	R	P	R		R													R		R	R						R																R	R	R
364-M0077A-27R-2, 30-32	C	M	Fr		F						R							R	Fr	F	Fr				Fr		F		C	?						R	R				R		Fr	Fr	R		R
364-M0077A-27R-CC	C	M	F		R		R				R								F	F	R				F		R		F								R	R			R		F	R
364-M0077A-28R-2, 34-36	Fr	P	R		R						R							R	R	R	R				R		R		R														Fr	Fr			R
364-M0077A-28R-CC	R	P	R		R		R				R							R		R	R				R		R		R									R			R		R	R
364-M0077A-29R-2, 22-24	A	P	Fr		R		R				R							R	Fr	Fr	C				Fr	R	F	R	Fr												Fr		C	C
364-M0077A-29R-CC	C	M	F		R		R				R							F	F	F	R				C	R	R										R	R			R		F	R	R
364-M0077A-30-2, 22-24	C	P	Fr		R		R				R							R	Fr	R	Fr				F		F	?	Fr	?											R		Fr	Fr			R	R
364-M0077A-30R-CC	R	P	R		R						R							R	R						R																		R	R
364-M0077A-31R-2, 52-54	R	P																R	R		R																						R	R
364-M0077A-31R-CC	B
364-M0077A-32R-1, 1-2	P	P	R		R													R			R						R														R		R		R
364-M0077A-32R-2, 19-21.5	P	P																	R		R			??						??													R		R
364-M0077A-33R-1, 76-77	Fr	P/M	R		R		R				R							Fr	F	R	F			??	F		R									R	R						Fr	Fr	R		R	R
364-M0077A-33R-CC			R		R															R	R																				R			R	R
364-M0077A-34R-2, 44-46.5	R	P	R		R		R													R	R			??	R																		R				R
364-M0077A-34R-CC	R	P		R			R											R		R	R				R		R																R	R	R
364-M0077A-35R-CC	F	P		R			R											R		R	R				R		R										R				R		R
364-M0077A-36R-2, 40-42.5		P					R													F							R									R							R
364-M0077A-36R-3, 6-7	R	P		?			R													R	R
364-M0077A-36R-CC	R	P					R			R			R	R						R											R												R			R
364-M0077A-37R-1, 0-1	R	P					R						R	R									R			R	R				R					R		R					R			R		R
364-M0077A-37R-1, 6-7*	Fr	M before degradation					Fr	R	F					R		R		P		Fr		Fr				R	R																F
364-M0077A-37R-1, 11-13*	Fr	M before degradation					Fr	R	F				R	R		R		P		Fr		F	R			R	R																Fr					R
364-M0077A-37R-1, 24-25	C	M					F	R	F					F		R	R			Fr		F				R	R									R							Fr					R
364-M0077A-37R-1, 35-37	A	M												F						Fr		Fr	R			R	R								R	R		R				F	C			R		R
364-M0077A-37R-1, 50-52	C	M												R					Fr	Fr		Fr	R			?	R								R	R						R	Fr
364-M0077A-37R-1, 74-76	Fr	P																	R	R		Fr											R	R					?									Fr	R
364-M0077A-37R-1, 100-102	Fr	P												?					R	R		Fr					?						R	R														Fr
364-M0077A-37R-1, 135-137	C	P																	Fr	R		Fr											R	R					?									Fr
364-M0077A-37R-1, 147-148																			R			R											R						?									R
364-M0077A-37R-2, 5-10	Fr	P																	F			F											R	R					?									Fr
364-M0077A-37R-2, 30-32	C	P																	R			R																										C
364-M0077A-37R-2, 55-57	C	P/M												?					R	R		Fr	R				?						R	R														Fr
364-M0077A-37R-2, 80-82	C	P																	R			R											R	R														Fr
364-M0077A-37R-2, 105-107	C	P																	Fr			Fr											F	R					R?									C
364-M0077A-37R-2, 130-132	A	M																	Fr	Fr		Fr											Fr	Fr					R?									C	R
364-M0077A-37R-2, 135	C	M																														R	R						R									C
364-M0077A-37R-CC	F	M																	R			F											R	R					R									F
364-M0077A-38R-1, 0-1	R	P																	R			R											R	R					?									F
364-M0077A-38R-1, 60-62	C	P																	Fr			Fr											F	F					R								Fr	C
364-M0077A-38R-1, 85-87	Fr	P																	Fr			Fr											F	F					R								Fr	Fr	R
364-M0077A-38R-1, 112-114	C	P																	Fr			Fr											Fr	F					R?								Fr	Fr
364-M0077A-38R-1, 135-137	Fr	P/M																	Fr			Fr											Fr	F					R?								Fr	Fr
364-M0077A-38R-2, 15-17	C	P																	F			Fr	R										R	R					R?								Fr	C	R
364-M0077A-38R-2, 65-67	C	P/M																	Fr			Fr	R										R	F					R								Fr	Fr
364-M0077A-38R-2, 90-92	C	P/M																	Fr			C											F	F					R	R							Fr	Fr	R
364-M0077A-38R-2, 115-117	C	P/M																	Fr			Fr											R	F						R							Fr	Fr
364-M0077A-38R-2, 140-142	V	P/M																	Fr			Fr											F	F													Fr	Fr
364-M0077A-38R-CC	F	P																	R			R											R	R														R	R
364-M0077A-39R-1, 5-7	Fr	P																	Fr	F		Fr	R										R	F													Fr	Fr
364-M0077A-39R-1, 30-32	C	M																	Fr	R		Fr											F	F													Fr	Fr
364-M0077A-39R-1, 55-57	C	M																	C	R		Fr											Fr	F													Fr	Fr
364-M0077A-39R-1, 80-82**	C	P/M																	Fr	R		F											F	F													Fr	Fr
364-M0077A-39R-1, 105-107	C	P																		R													R	R													C	C
364-M0077A-39R-1, 130-132	C	P																															R														C	C
364-M0077A-39R-2, 5-7	C	P																	R														R														C	C
364-M0077A-39R-2, 30-32	C	P/M																															P														C	C
364-M0077A-39R-2, 46-49	C	M																																													C	C
364-M0077A-39R-2, 55-57	C	P																																													C	C
364-M0077A-39R-2, 80-82	Fr	P																																													Fr	Fr
364-M0077A-39R-2, 115-117	Fr	P																	R			R																									Fr	Fr
364-M0077A-39R-3, 10-12	Fr	P																				R																									F	Fr
364-M0077A-39R-3, 25-26	Fr	P																	R																												F	Fr
364-M0077A-39R-CC	R	P																	R														R	R														F
364-M0077A-40R-1, 10-11	F	P																																													R	F
364-M0077A-40R-1, 32-33	P	P
364-M0077A-40R-1, 42-43	P	P
364-M0077A-40R-3, 28-30	P	P
364-M0077A-40R-3, 32	P	P
364-M0077A-40R-CC	R	M
364-M0077A-41R-CC	P	P
364-M0077A-42R-CC	P	P
364-M0077A-44R-CC
364-M0077A-48R-CC
364-M0077A-53R-CC
364-M0077A-54R-CC
364-M0077A-55R-CC
364-M0077A-56R-CC
364-M0077A-57R-CC
364-M0077A-59R-CC
[truncated: 33 more columns]

## Sheet: Foraminiferal Data
/* DATA DESCRIPTION:
Citation:	IODP Expedition 364 Scientists (2018): Foraminifers of IODP Hole 364-M0077A. PANGAEA, https://doi.org/10.1594/PANGAEA.886115
Related to:	Gulick, Sean; Morgan, C L; Mellett, Claire; Green, S L; Bralower, Timothy J; Chenot, Elise; Christeson, Gail; Claeys, Philippe; Cockell, Charles; Coolen, M J L; FerriÃ¨re, Ludovic; Gebhardt, Catalina; Goto, Kazuhisha; Jones, Heather; Kring, David; Lofi, Johanna; Lowery, Chris; Ocampo-Torres, RubÃ©n; Perez-Cruz, Ligia; Pickersgill, A E; Poelchau, Michael; Rae, Auriol; Rasmussen, Cornelia; Rebolled…
Project(s):	Integrated Ocean Drilling Program / International Ocean Discovery Program (IODP) (URI: http://www.iodp.org/)
Coverage:	LATITUDE: 21.450150 * LONGITUDE: -89.949367
	DATE/TIME START: 2016-07-04T00:00:00 * DATE/TIME END: 2016-07-04T00:00:00
	MINIMUM DEPTH, sediment/rock: 503.40 m * MAXIMUM DEPTH, sediment/rock: 617.21 m
Event(s):	364-M0077A (Chicx-03B) * LATITUDE: 21.450150 * LONGITUDE: -89.949367 * DATE/TIME: 2016-07-04T00:00:00 * ELEVATION: -19.8 m * IGSN: hdl:10273/IBCR0364EHB0001 * LOCATION: Golf of Mexico * CAMPAIGN: Exp364 * BASIS: Myrtle (URI: http://www.montco.com/MO/)
Parameter(s):	Sample code/label (Sample label) * PI: IODP Expedition 364 Scientists
	DEPTH, sediment/rock [m] (Depth) * GEOCODE * PI: IODP Expedition 364 Scientists * COMMENT: mbsf
	Zone (Zone) * PI: IODP Expedition 364 Scientists
	Principle investigator (PI) * PI: IODP Expedition 364 Scientists
	Preservation (Preserv) * PI: IODP Expedition 364 Scientists
	Abundance (Abund) * PI: IODP Expedition 364 Scientists
	Pyrite (Py) * PI: IODP Expedition 364 Scientists
	Fragments (Fragm) * PI: IODP Expedition 364 Scientists * COMMENT: Foraminifer fragments
	Fish remains (Fish rem) * PI: IODP Expedition 364 Scientists * COMMENT: Fish debris
	Echinoid spine (Echinoid spine) * PI: IODP Expedition 364 Scientists
	Radiolarians abundance (Rad abund) * PI: IODP Expedition 364 Scientists
	Ostracoda (Ostrac) * PI: IODP Expedition 364 Scientists
	Dinoflagellates, calcareous (Dinofl cal) * PI: IODP Expedition 364 Scientists
	Glasses (Glasses) * PI: IODP Expedition 364 Scientists * COMMENT: Reworked impactite glass
	Glauconite (Glt) * PI: IODP Expedition 364 Scientists
	Foraminifera, planktic [%] (Foram plankt) * PI: IODP Expedition 364 Scientists
	Foraminifera, planktic reworked (Foram plankt rew) * PI: IODP Expedition 364 Scientists * COMMENT: Cretaceous reworking
	Acarinina aspensis (A. aspensis) * PI: IODP Expedition 364 Scientists
	Acarinina cuneicamerata (A. cuneicamerata) * PI: IODP Expedition 364 Scientists
	Acarinina wilcoxensis (A. wilcoxensis) * PI: IODP Expedition 364 Scientists
	Acarinina sp. (Acarinina sp.) * PI: IODP Expedition 364 Scientists
	Acarinina soldadoensis (A. soldadoensis) * PI: IODP Expedition 364 Scientists
	Astrorotalia palmerae (A. palmerae) * PI: IODP Expedition 364 Scientists
	Igorina albeari (I. albeari) * PI: IODP Expedition 364 Scientists
	Igorina broedermanni (I. broedermanni) * PI: IODP Expedition 364 Scientists
	Igorina pusilla (I. pusilla) * PI: IODP Expedition 364 Scientists
	Morozovella aragonensis (M. aragonensis) * PI: IODP Expedition 364 Scientists
	Morozovella aequa (M. aequa) * PI: IODP Expedition 364 Scientists
	Morozovella acuta (M. acuta) * PI: IODP Expedition 364 Scientists
	Morozovella subbotinae (M. subbotinae) * PI: IODP Expedition 364 Scientists
	Morozovella formosa (M. formosa) * PI: IODP Expedition 364 Scientists
	Morozovella spp. (Morozovella spp.) * PI: IODP Expedition 364 Scientists
	Pseudohastigerina wilcoxensis (P. wilcoxensis) * PI: IODP Expedition 364 Scientists
	Planoglobanomalina pseudoalgeriana (P. pseudoalgeriana) * PI: IODP Expedition 364 Scientists
	Subbotina spp. (Subbotina spp.) * PI: IODP Expedition 364 Scientists
	Planorotalites pseudoscitula (P. pseudoscitula) * PI: IODP Expedition 364 Scientists
	Parasubbotina eoclava (P. eoclava) * PI: IODP Expedition 364 Scientists
	Globoturborotalita bassriverensis (G. bassriverensis) * PI: IODP Expedition 364 Scientists
	Subbotina roesnaesensis (S. roesnaesensis) * PI: IODP Expedition 364 Scientists
	Subbotina linaperta (S. linaperta) * PI: IODP Expedition 364 Scientists
	Subbotina triloculinoides (S. triloculinoides) * PI: IODP Expedition 364 Scientists
	Subbotina trivialis (S. trivialis) * PI: IODP Expedition 364 Scientists
	Subbotina crociapertura (S. crociapertura) * PI: IODP Expedition 364 Scientists
	Turborotalia frontosa (T. frontosa) * PI: IODP Expedition 364 Scientists
	Zeauvigerina spp. (Zeauvigerina spp.) * PI: IODP Expedition 364 Scientists
	Chiloguembelina criniata (C. criniata) * PI: IODP Expedition 364 Scientists
	Chiloguembelina trinitatensis (C. trinitatensis) * PI: IODP Expedition 364 Scientists
	Chiloguembelina spp. (Chiloguembelina spp.) * PI: IODP Expedition 364 Scientists
	Globanomalina spp. (Globanomalina spp.) * PI: IODP Expedition 364 Scientists
	Globanomalina archeocompressa (G. archeocompressa) * PI: IODP Expedition 364 Scientists
	Globanomalina compressa (G. compressa) * PI: IODP Expedition 364 Scientists
	Globanomalina planocompressa (G. planocompressa) * PI: IODP Expedition 364 Scientists
	Globanomalina pseudomenardii (G. pseudomenardii) * PI: IODP Expedition 364 Scientists
	Globanomalina planoconica (G. planoconica) * PI: IODP Expedition 364 Scientists
	Chiloguembelina spp. (Chiloguembelina spp.) * PI: IODP Expedition 364 Scientists
	Woodringina spp. (Woodringina spp.) * PI: IODP Expedition 364 Scientists
	Parasubbotina pseudobulloides (P. pseudobulloides) * PI: IODP Expedition 364 Scientists
	Parasubbotina varianta (P. varianta) * PI: IODP Expedition 364 Scientists
	Eoglobigerina eobulloides (E. eobulloides) * PI: IODP Expedition 364 Scientists
	Eoglobigerina spp. (Eoglobigerina spp.) * PI: IODP Expedition 364 Scientists
	Eoglobigerina edita (E. edita) * PI: IODP Expedition 364 Scientists
	Praemurica pseudoinconstans (P. pseudoinconstans) * PI: IODP Expedition 364 Scientists
	Praemurica taurica (P. taurica) * PI: IODP Expedition 364 Scientists
	Praemurica inconstans (P. inconstans) * PI: IODP Expedition 364 Scientists
	Praemurica pseudoinconstans (P. pseudoinconstans) * PI: IODP Expedition 364 Scientists
	Praemurica uncinata (P. uncinata) * PI: IODP Expedition 364 Scientists
	Praemurica spp. (Praemurica spp.) * PI: IODP Expedition 364 Scientists
	Rectoguembelina cretacea (R. cretacea) * PI: IODP Expedition 364 Scientists
	Parvularugoglobigerina minutula (P. minutula) * PI: IODP Expedition 364 Scientists * COMMENT: Parvularugoglobigerina minutula/extensa
	Parvularugoglobigerina alabamensis (P. alabamensis) * PI: IODP Expedition 364 Scientists
	Parvularugoglobigerina eugubina (P. eugubina) * PI: IODP Expedition 364 Scientists * COMMENT: longiapertura
	Guembelitria cretacea (G. cretacea) * PI: IODP Expedition 364 Scientists
	Foraminifera, benthic (Foram bent) * PI: IODP Expedition 364 Scientists
	Aragonia spp. (Aragonia spp.) * PI: IODP Expedition 364 Scientists
	Uvigerina sp. (Uvigerina sp.) * PI: IODP Expedition 364 Scientists
	Bolivina spp. (Bolivina spp.) * PI: IODP Expedition 364 Scientists
	Bulimina trinitatensis (B. trinitatensis) * PI: IODP Expedition 364 Scientists
	Bulimina sp. (Bulimina sp.) * PI: IODP Expedition 364 Scientists
	Buliminella spp. (Buliminella spp.) * PI: IODP Expedition 364 Scientists
	Gavelinella sp. (Gavelinella sp.) * PI: IODP Expedition 364 Scientists
	Gaudryina sp. (Gaudryina sp.) * PI: IODP Expedition 364 Scientists
	Gyroidinoides globosus (G. globosus) * PI: IODP Expedition 364 Scientists
	Gyroidinoides sp. (Gyroidinoides sp.) * PI: IODP Expedition 364 Scientists
	Nodosaria sp. (Nodosaria sp.) * PI: IODP Expedition 364 Scientists
	Bolivina sp. (Bolivina sp.) * PI: IODP Expedition 364 Scientists
	Foraminifera, benthic agglutinated (Foram bent agg) * PI: IODP Expedition 364 Scientists * COMMENT: Misc. arenaceous
	Nuttallides sp. (Nuttallides sp.) * PI: IODP Expedition 364 Scientists
	Osangularia sp. (Osangularia sp.) * PI: IODP Expedition 364 Scientists
	Stensioeina beccariiformis (S. beccariiformis) * PI: IODP Expedition 364 Scientists
	Trochammina spp. (Trochammina spp.) * PI: IODP Expedition 364 Scientists
	Foraminifera, benthic, uniserial (Uniserial taxa) * PI: IODP Expedition 364 Scientists * COMMENT: uniserial spp.
	Bulimina cf. midwayensis (Bulimina cf. midwayensis) * PI: IODP Expedition 364 Scientists
	Planulina spp. (Planulina spp.) * PI: IODP Expedition 364 Scientists
	Anomalinoides spp. (Anomalinoides spp.) * PI: IODP Expedition 364 Scientists
	Cibicidoides spp. (Cibicidoides spp.) * PI: IODP Expedition 364 Scientists
	Cibicides spp. (Cibicides spp.) * PI: IODP Expedition 364 Scientists
	Coryphostoma spp. (Coryphostoma spp.) * PI: IODP Expedition 364 Scientists
	Lenticulina spp. (Lenticulina spp.) * PI: IODP Expedition 364 Scientists
	Pyrgo spp. (Pyrgo spp.) * PI: IODP Expedition 364 Scientists
	Spiroplectammina sp. (Spiroplectammina sp.) * PI: IODP Expedition 364 Scientists * COMMENT: Spiroplectammina? sp.
	Bathysiphon spp. (Bathysiphon spp.) * PI: IODP Expedition 364 Scientists * COMMENT: Bathysiphon? spp.
	Comment (Comment) * PI: IODP Expedition 364 Scientists
License:	Creative Commons Attribution 3.0 Unported (CC-BY-3.0)
Size:	1476 data points
*/
Sample label	Depth [m]	Zone	PI	Preserv	Abund	Py	Fragm	Fish rem	Echinoid spine	Rad abund	Ostrac	Dinofl cal	Glasses	Glt	Foram plankt [%]	Foram plankt rew	A. aspensis	A. cuneicamerata	A. wilcoxensis	Acarinina sp.	A. soldadoensis	A. palmerae	I. albeari	I. broedermanni	I. pusilla	M. aragonensis	M. aequa	M. acuta	M. subbotinae	M. formosa	Morozovella spp.	P. wilcoxensis	P. pseudoalgeriana	Subbotina spp.	P. pseudoscitula	P. eoclava	G. bassriverensis	S. roesnaesensis	S. linaperta	S. triloculinoides	S. trivialis	S. crociapertura	T. frontosa	Zeauvigerina spp.	C. criniata	C. trinitatensis	Chiloguembelina spp.	Globanomalina spp.	G. archeocompressa
Cuttings	503.4	E7b	CL	M	A					A					70				P	R				F			C					C	R	R									F
364-M0077A-1R-1,15	505.85	E7b	CL	M	R		F								99					R												P		R									F
364-M0077A-1R-1,CC	505.86	E7b	CL	M	C		F	P		P					99					A				R								R		A	P							P	P					P
364-M0077A-2R-1,22-23	506.8	E7b	CL	P	A										99					R												P		R	R
364-M0077A-3R-1,44-45	506.56	E7b	CL	M	A		R			A					99			R	C	C				P								C	P	A
364-M0077A-3R-1,83-84	506.95	E7a	CL	M	A		C			C					99				P	F				R										C
364-M0077A-4R-1,37-38	507.29	E7a	CL	M	C					A					99				C	C				R								A		A	C
364-M0077A-4R-2,37-38	508.29	E7a	CL	M	C					P					99					C				R								C		C	P
364-M0077A-4R-3,76-77	510.03	E7a	CL	P	F					A					100					R												P		C	R
	511	E7a	CL	G	R		P			R					99				F	F												P		F	R
364-M0077A-5R-2,109-110	512.4	E7a	CL	P	F					A					99																	R		C	R
364-M0077A-6R-1,143-144	513.95	E7a	CL	M	C					A					99			F		C												A		A	P	C
364-M0077A-6R-1,152	514.04	E7a	CL	VP	No recoverable foraminifers										0
364-M0077A-6R-2,149-150	515.53	E7a	CL	VP											0
364-M0077A-7R-3,60	518.68	E7a	CL	VP											0
364-M0077A-8R-3,81	521.67	E7a	CL	M	A	P				A					95				F	F				P							?	P		A			R	R
364-M0077A-9R-3,78-79	524.53	E7a	CL	P	R					A					100																			R	P
364-M0077A-9R-3,95-97	524.7	E7a	CL	VP	No recoverable foraminifers										0
364-M0077A-10R-1,56-59	525.2	E7a	CL	M	F		R								99				C	A	F			C										A
364-M0077A-10R-2,155-160	527.67	E7a	CL	P	R					A					100					P				P										F
364-M0077A-11R-3,41-42	530.8	E7a	CL	P	F					A					100				P													P		C			R	P	P
364-M0077A-12R-3,92-94	533.96	E7a	CL	P	R					A					99				R													P		F	P
364-M0077A-13R-2,80-82	535.79	E7a	CL	P	F		R			F					99					R	P			R								F		F
364-M0077A-13R-3,73-74	536.96	E7a	CL	P	F					A					99									P										C	P
364-M0077A-14R,22-24	537.16	E7a	CL	G	D		R		A	P					60				A	A	A			A								A		A	A		A	A
364-M0077A-14R-2,82-84	539.28	E7a	CL	G	F			P		C					1				P					P										R	P
364-M0077A-14R-2,151-152	539.97	E7a	CL	P	R					A					100				P					R								P		F	R
364-M0077A-15R-1,46-47	540.45	E7a	CL	G	A		R	P		R					99			R		C		R		F		F						C		A	P		P
364-M0077A-15R-2,20-22	541.69	E7a	CL	M	A				R	D					99					R	F			R			R					C		C	A		P
364-M0077A-15R-3,13-15	543.12	E7a	CL	P	R					A					99									P								P		R	P		P
364-M0077A-16R-1,67-69	543.71	E7a	CL	M	A		P			A					99			P	A		A		P	R			P					A		A	A		A	F	F
364-M0077A-16R-3,63-67	546.06	E7a	CL	P	A					A					99				R					P							?	R		A										P
364-M0077A-17R-3,0-1	548.74	E7a	CL	M	A			A		A					95				C					F								R		A				P
364-M0077A-17R-3,42-43	549.16	E7a	CL	VP	No recoverable foraminifers										0
364-M0077A-18R-3,16-17	552.24	E7a	CL	P	A		A								99				R					R								P		A				P	?
364-M0077A-19R-2,62-64	554.14	E7a	CL	M	A	P	R	P		F					98		P	F		A				R								F		A	R	P
364-M0077A-19R-3,27-28	555.23		CL	VP	No recoverable foraminifers										0
364-M0077A-20R-2,152-153	558.27		CL	VP											0
364-M0077A-21R-3,15-17	561.29		CL	VP											0
364-M0077A-22R-3,69-70	564.45	E6/5	CL	P	F										99				R					R								R		F
364-M0077A-23R-2,152-154	567.41	E6/5	CL	M	A		A								99				C					R								R		A
364-M0077A-24R-3,16-17	570.57	E6/5	CL	P	R		F								100				R															R
364-M0077A-25R-3,50-51	573.56	E6/5	CL	P	R		F								100				R															R
364-M0077A-26R-3,51-52	576.64	E6/5	CL	VP	R	F	No recoverable foraminifers								0
364-M0077A-27R-3,16-17	579.69	E6/5	CL	P						A					99		R															P		R	P
364-M0077A-28R-3,36-38	582.6	E6/5	CL	VP	No recoverable foraminifers										0
364-M0077A-29R-3,83-84	585.8	E6/5	CL	P	R		F			A					99				P													P		F
364-M0077A-30R-3,44-45	588.8	E6/5	CL	VP						R					0
364-M0077A-31R-3,78-79	591.92	E5	CL	VP	No recoverable foraminifers										0
364-M0077A-32R-3,111-112	594.25	E5	CL	VP											0
364-M0077A-33R-2,97-99	597.36	E5	CL	VP						F					0						P													P
364-M0077A-33R-3,48-49	597.98	E5	CL	VP	No recoverable foraminifers										0
364-M0077A-34R-3,56-57	600.98	E5	CL	P	R		A								99				F					F		R								F
364-M0077A-35R-3,45-48	604.05	E5	CL	P	R		A	P							95				F					F						?	R			F											P
364-M0077A-36R-1,43-44	604.47	E5	CL	P	R					R				P	99				F		F										F			A
364-M0077A-36R-2,0-2	605.03	E5	CL	M	A	R			R					P	90				F		F					P			C	R	C			A
364-M0077A-36R-2,40-42	605.43	E5	CL	P	R					P				P	95				R		R					R			R	P	F			A	P
364-M0077A-36R-3,6-7	606.17	E5	CL	M	F	R				R					90				F		F			P		R			R	F	C			A	F
364-M0077A-36R-4,16-17	606.89		CL	P		P		P							99				F					R			P			P				F					P	?				P				?
364-M0077A-37R-1,0-1	607.02		CL	P	A	P	F	P					R		100																								P								C	A
364-M0077A-37R-1,5-5.5	607.07		CL	M	P	R		R	P				R		0					RW
364-M0077A-37R-1,6-7	607.08		CL	M		R		R	P				R		0																																rw
364-M0077A-37R-1,8-9	607.1		CL	P	R	R	P	R	P				R		100					P											F			F
364-M0077A-37R-1,11-13	607.13		CL	VP		R	P	P	P				P		0	B
364-M0077A-37R-1,11-13	607.13	P4b	JS												0
364-M0077A-37R-1,24-25	607.26		CL	VP	RW	R	P	R	R				R		0
364-M0077A-37R-1,29-31	607.31		CL	VP											0
364-M0077A-37R-1,35-39	607.37		CL	P	A	P	R								90					A			F				A	A			A			A
364-M0077A-37R-1,50-52	607.52		CL	VP	F										95					F			R				F	F			A			A
364-M0077A-37R-1,74-77	607.77	P3	CL	VP	F	P	R	P							98																			A
364-M0077A-37R-1,100-102	608.02	P3	CL	P	F		R								99										P									C										P			C
364-M0077A-37R-1,135-137	608.37	P3	CL	P	F										0										P									C													C
364-M0077A-37R-1,147-148	608.49		CL	P	A		A								100																									P								A
364-M0077A-37R-2,30-32	609.3		CL	M	A		R								0																									?
364-M0077A-37R-2,30-31	609.3	p2	JS	M	A		A								90
364-M0077A-37R-2,55-57	609.55		JS	P	A		A		P			R			90
364-M0077A-37R-2,135-136	610.35		CL	G	A		P		P						60																			A												F	R	C
364-M0077A-37R-2,135-136	610.35	p2	JS	M	A		A								50																			A
364-M0077A-37R-3,20-21	613.06	P1c	JS	M	A										90																									F
364-M0077A-37R-3,33-34	610.19		CL	P	A	F	A								95																									?							A	A
364-M0077A-38R-1,60-62	610.71	P1c	JS	P											95																			C						C	C
364-M0077A-38R-2,15-17	611.75	p1b	JS	P											95																			C						F	F
364-M0077A-38R-2,34-36	611.94	p1b	JS												0
364-M0077A-38R-2,40-42	612	P1b	JS	p	A	P									95																			C						C	C
364-M0077A-38R-2,65-67	610.79		JS	P-M	A										95																			C						F	F
364-M0077A-38R-2,140-142	611.54	P1b	JS	G-M	A		A								95																			C						P	C
364-M0077A-38R-3,14-15	613.19	P1b	CL	P	A		C								99																									F							F	A
364-M0077A-38R-3,14-15	613.19	P1b	JS	P-M	A		R								90																										F
364-M0077A-39R-1,5-7	613.24	P1b	JS	M	A		C					R			95																			A														C
364-M0077A-39R-1,80-82	613.99	P1b	JS	M-G	A	P	C								98																									F	A
364-M0077A-39R-1,105-107	614.61	P1b	JS	P-M	A	P	D								95																			A
364-M0077A-39R-2,5-7	614.66	P1b	JS	M-G	A		A					A			95																			A											C
364-M0077A-39R-2,30-32	614.86	P1b	JS	M	A										95																			A						R	C							R	R
364-M0077A-39R-2,35/37	614.96	P1a	JS	M-P	A	P	A					D			95																			F							R				C			C
364-M0077A-39R-2,46-49	615.05	P1a	CL/JS	M	D		R								98																										R			A				C
364-M0077A-39R-2,55/57	615.11	P1a	JS	M	A						R	A			98																			R							C							C
364-M0077A-39R-2,80-82	615.36	P1a	JS	M-G	A		R								98																			A							R
364-M0077A-39R-2,115-117	615.71	P1a	JS	M	A	R						D			98																			F														C	C
364-M0077A-39R-3,25-26	616.02	P1a	CL/JS	M	A		P								98																													A				A
364-M0077A-39R-3,41-44	616.18	P1a	CL	P	A		A								100																																C	A
364-M0077A-39R-CC,47-49	616.24	P1a	JS	VP	F	P	P					D			30
364-M0077A-40R-1,10-11	616.34	Pa	JS	M											90
364-M0077A-40R-1,32-33	616.55	Pa	JS	M	A	P	P					R			95
364-M0077A-40R-1,33.5-34	616.57	Pa	JS												95
364-M0077A-40R-1,42-43	616.65		JS	VP		P							P
364-M0077A-40R-1,97-98	617.21		CL		P	R			P				R			C
[truncated: 52 more columns]

## Sheet: Ichnology
mbsf	BI	Ichnotaxa
605.9	4	Scolicia
606.1	4	Scolicia
606.11	2	Scolicia
606.16	2	Scolicia
606.17	6	Scolicia
606.37	6	Scolicia
606.38	1	Chondrites
606.43	1	Chondrites
606.44	2	Chondrites
606.52	2	Chondrites
606.53	1	Chondrites
606.54	1
606.55	5
606.56	5
606.57	0
606.63	0
606.65	3
606.73	3
606.85	6
607.02	6
607.07	6
607.08	0
607.12	0
607.13	1	Chondrites
607.14	0
607.16	1	Chondrites
607.19	0
607.21	1	Chondrites
607.23	0
607.25	1	Chondrites
607.28	0
607.29	1	Chondrites
607.35	1
607.36	6	Planolites & Zoophycos
607.68	6	Planolites & Zoophycos
607.74	5	Planolites & Zoophycos
